# Supplementary material for: Structure controlled solvatochromism and halochromic fluorescence switching of 2,2′-bipyridine based donor–acceptor derivatives
Source: Royal Society of Chemistry journal article supplement (doi:10.1039/d0nj02560g), 2020-01-01
Supplement: d0nj02560g1.pdf [file d0nj02560g1.pdf]

## Electronic Supplementary Information (ESI)

### Structure controlled solvatochromism and halochromic fluorescence switching of 2,2'-bipyridine based donor-acceptor derivatives

Palaniyappan Nagarasu,<sup>a</sup> Anu Kundu,<sup>b</sup> Jayaraman Pitchaimani,<sup>a</sup> Savarimuthu Philip Anthony,<sup>b\*</sup> Dohyun Moon,<sup>c\*</sup> and Vedichi Madhu<sup>a\*</sup>

<sup>a</sup>*Department of Applied Chemistry, Karunya Institute of Technology and Science, Coimbatore-641 114, Tamil Nadu, India. Tel: +91-422-261-4483;*

*E-mail: [madhu@karunya.edu](mailto:madhu@karunya.edu); [vmadhu1@gmail.com](mailto:vmadhu1@gmail.com)*

<sup>b</sup>*School of Chemical & Biotechnology, SASTRA Deemed University, Thanjavur- 613401, Tamil Nadu, India. [philip@biotech.sastra.edu](mailto:philip@biotech.sastra.edu)*

<sup>c</sup>*Beamline Department, Pohang Accelerator Laboratory, 80 Jigokro-127 beongil, Nam-gu, Pohang, Gyeongbuk Korea. [dmoon@postech.ac.kr](mailto:dmoon@postech.ac.kr)*

| <b>S.No.</b> | <b>Content</b>                               | <b>Page No.</b> |
|--------------|----------------------------------------------|-----------------|
| 1            | FT-IR spectra                                | 3               |
| 2            | NMR Studies                                  | 7               |
| 3            | Mass analysis                                | 12              |
| 4            | Single Crystal X-ray crystallography studies | 16              |
| 5            | Photophysical Properties                     | 21              |
| 6            | References                                   | 27              |

## 1. FT-IR Spectra

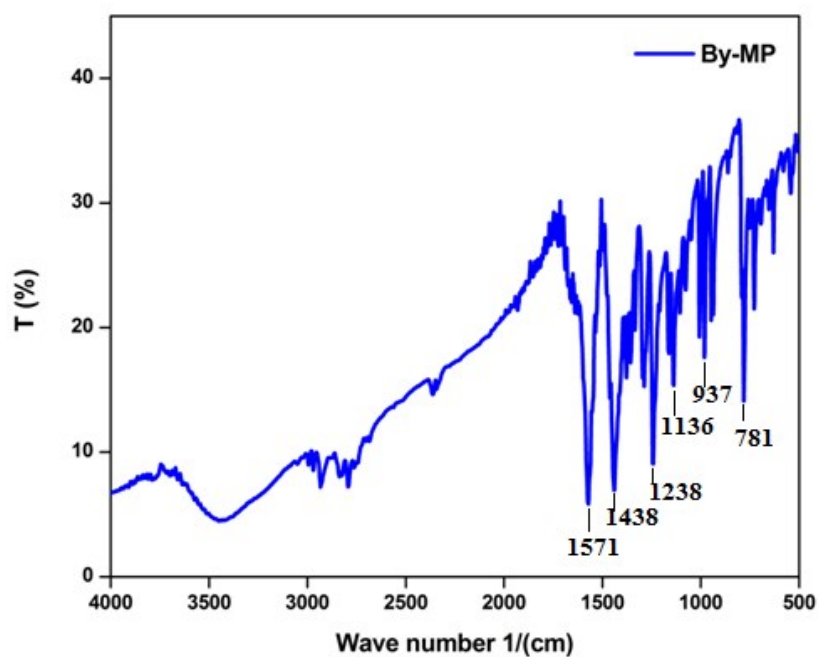

Fig. S1 FT-IR spectrum of Bpy-1MP.

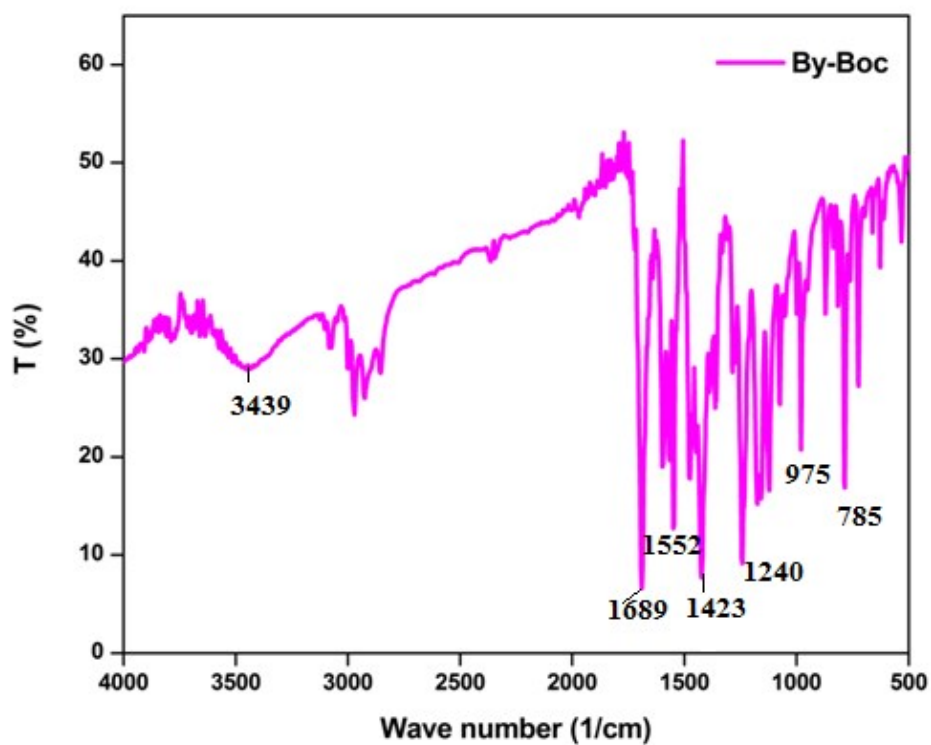

Fig. S2 FT-IR spectrum of Bpy-BP.

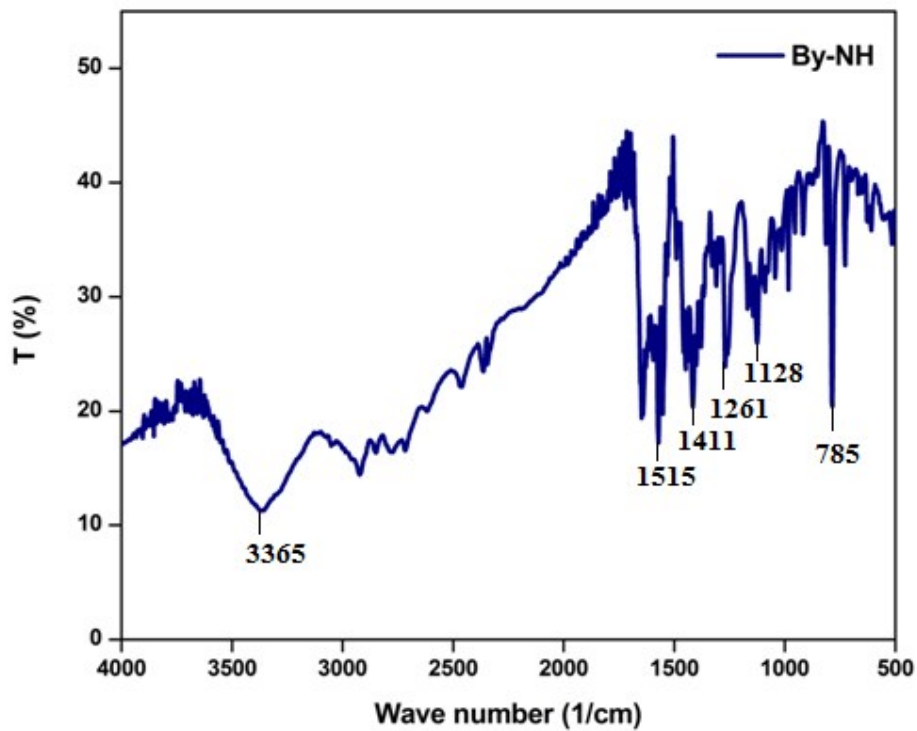

Fig. S3 FT-IR spectrum of Bpy-Pep.

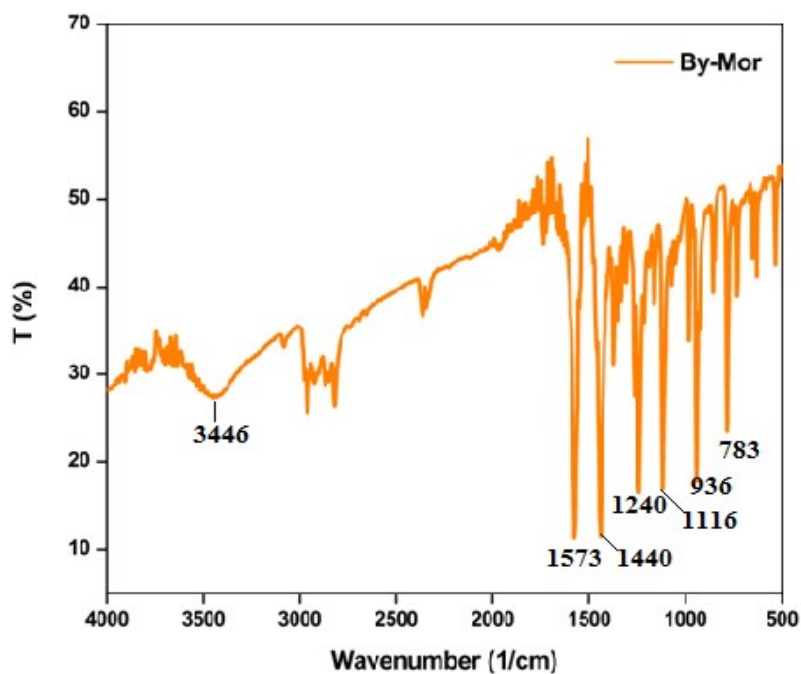

Fig. S4 FT-IR spectrum of Bpy-Mor.

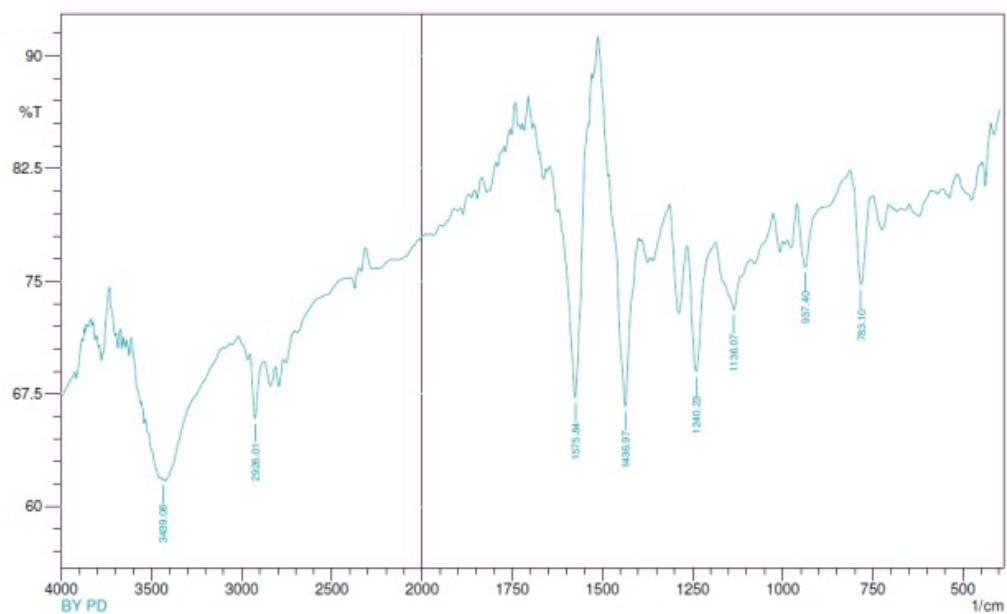

**Fig. S5** FT-IR spectrum of Bpy-Pip

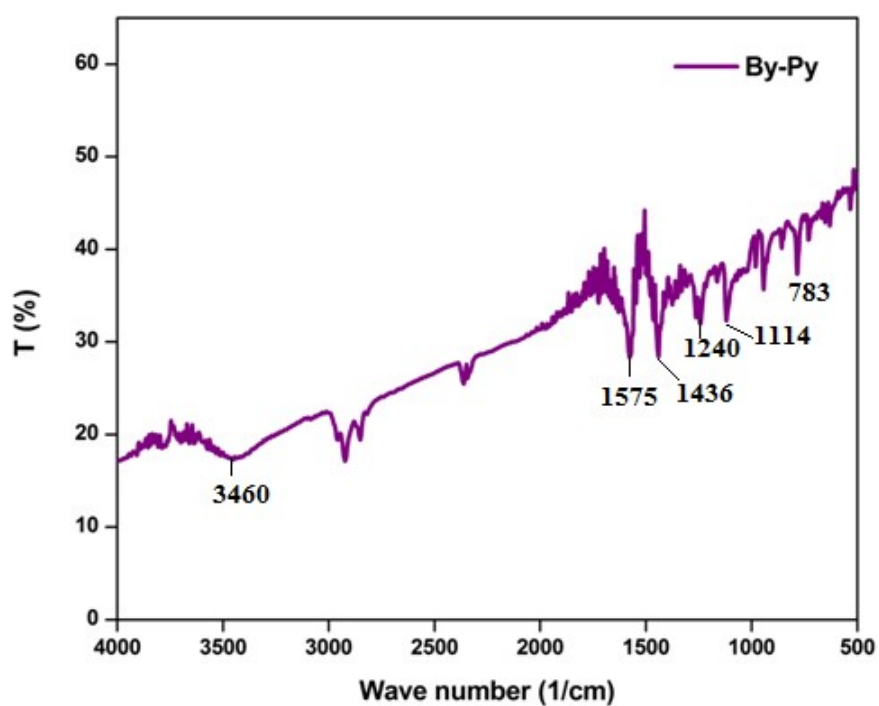

**Fig. S6** FT-IR spectrum of Bpy-Pyr.

## 2. NMR Studies

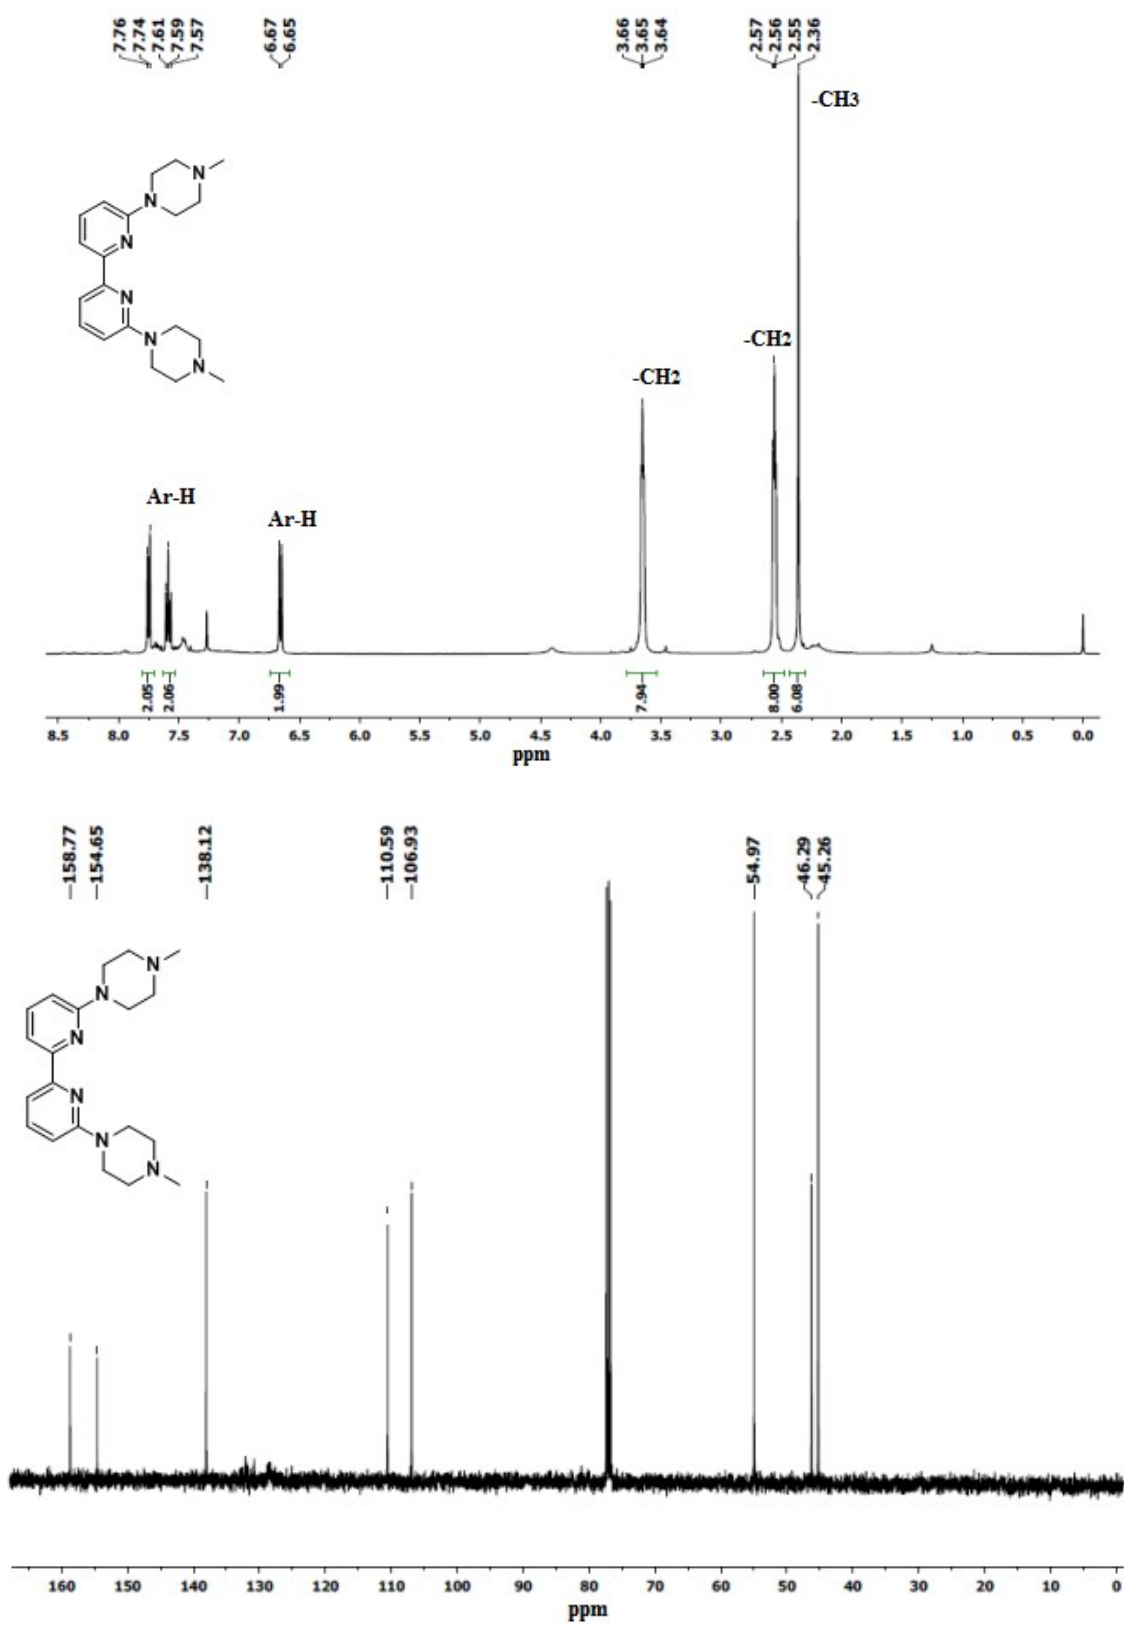

Fig. S7  $^1\text{H}$  &  $^{13}\text{C}$  NMR spectrum of Bpy-1MP.

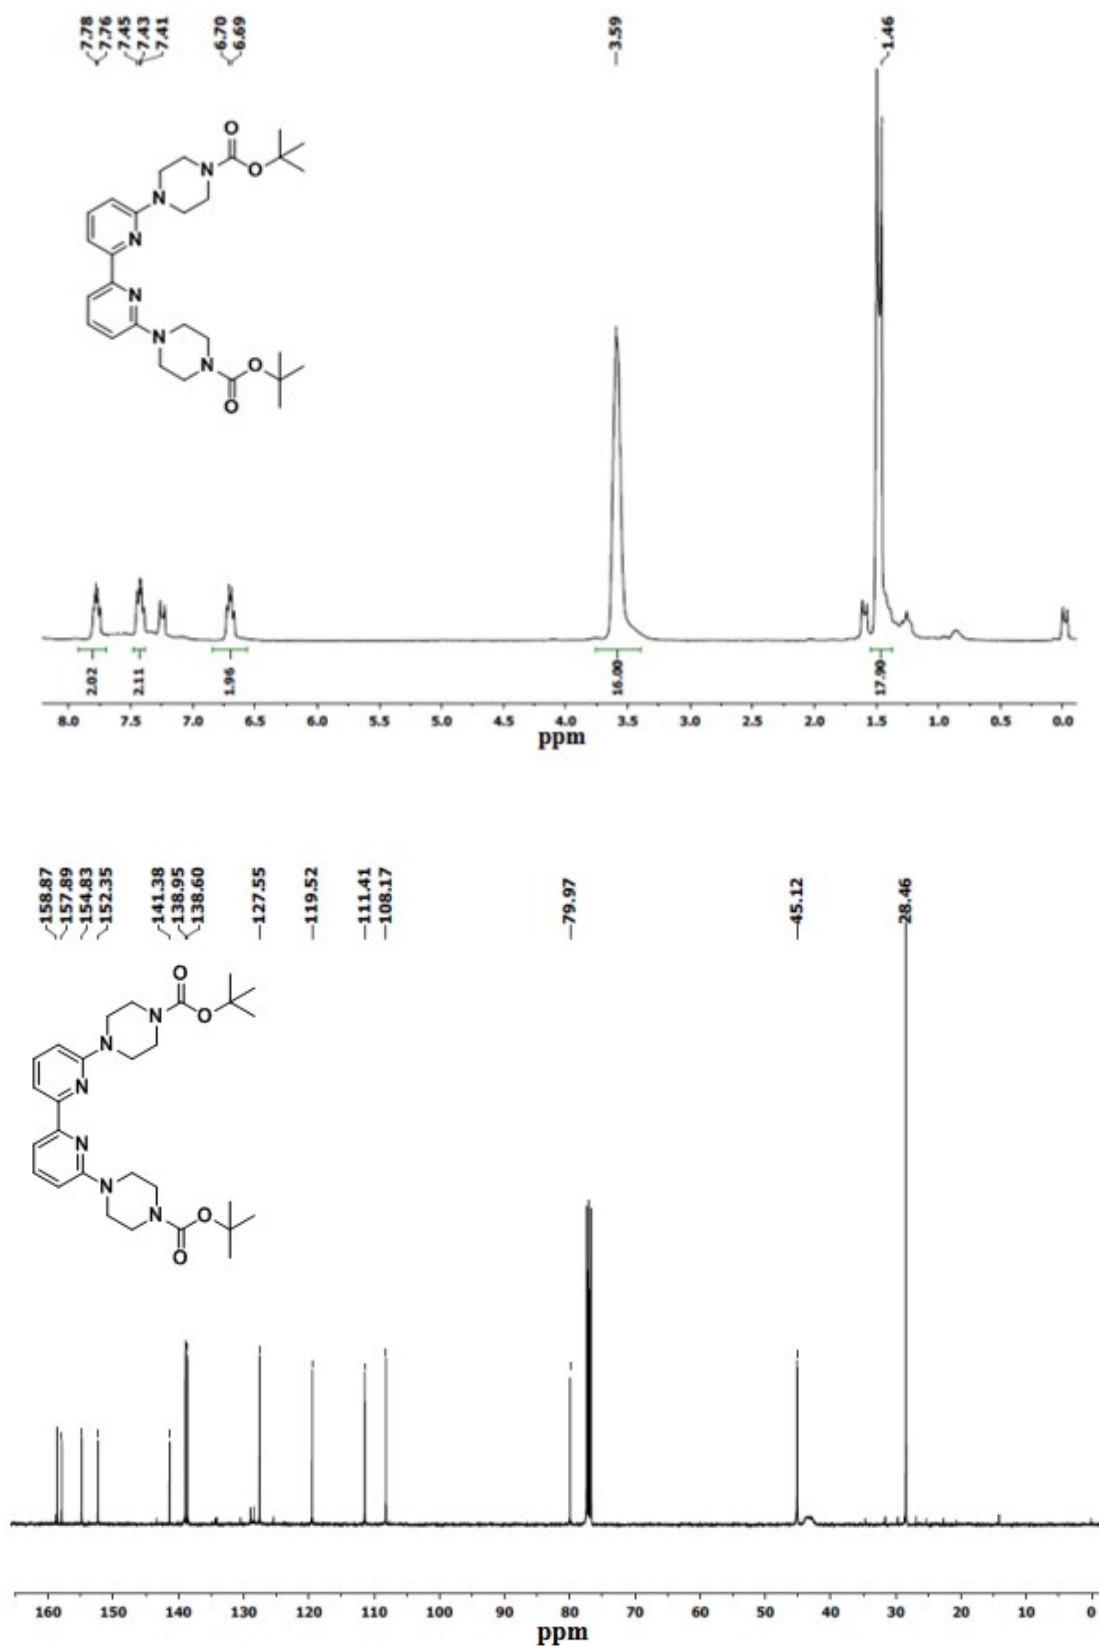

**Fig. S8** <sup>1</sup>H & <sup>13</sup>C NMR spectrum of Bpy-BP.

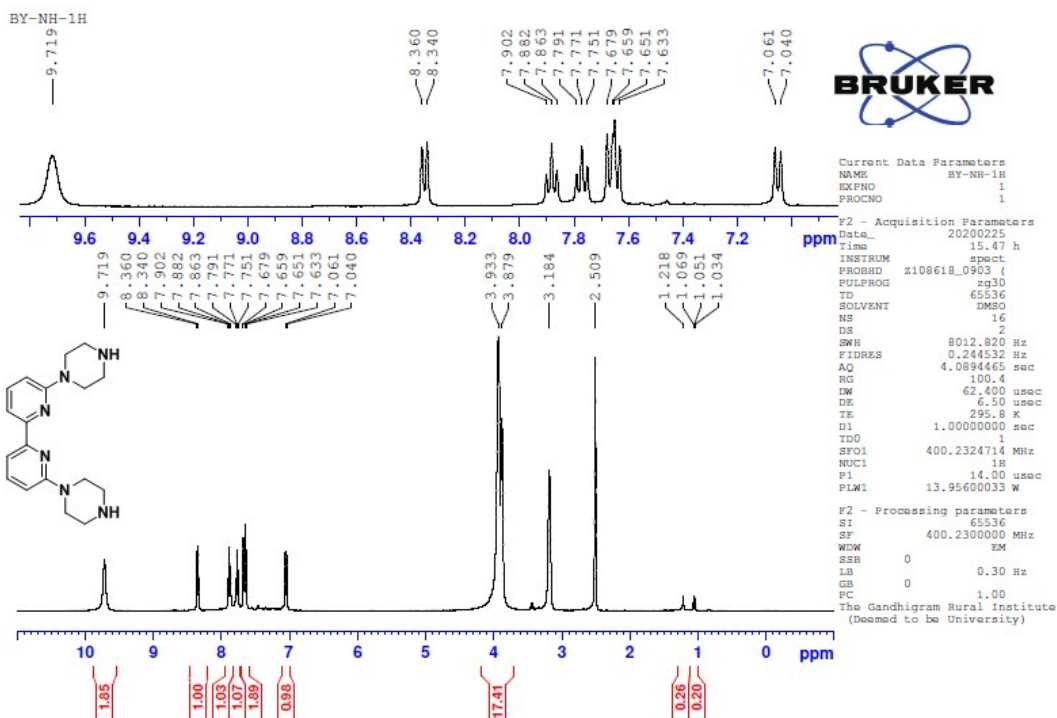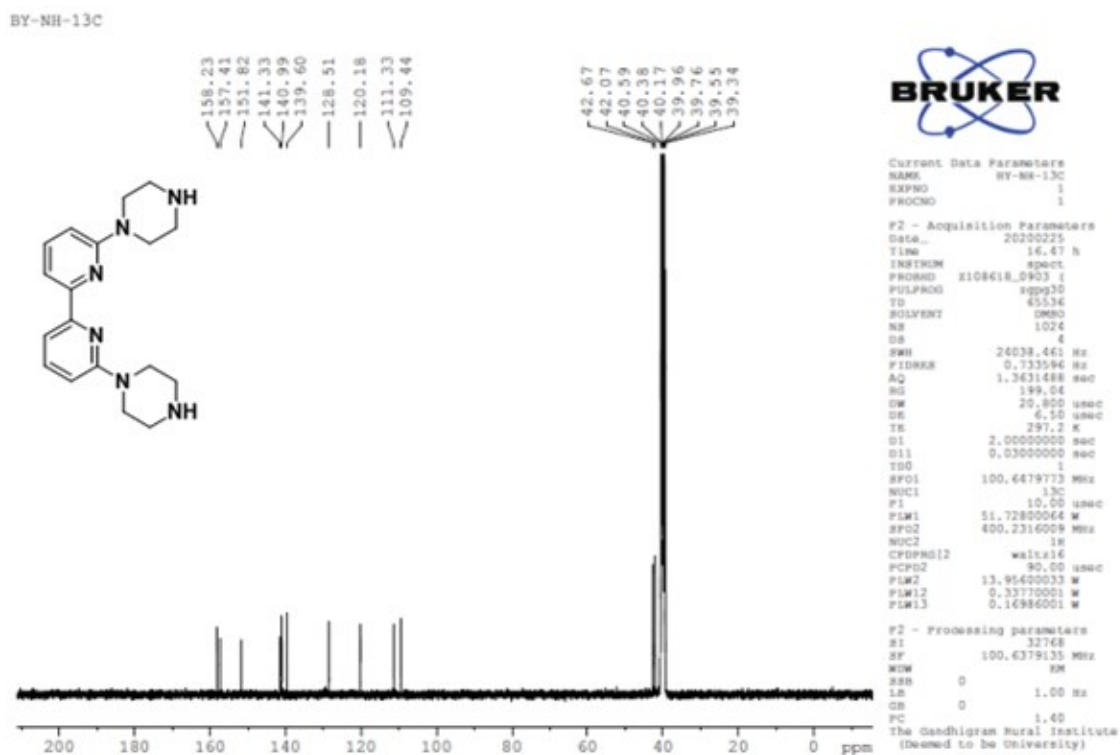

Fig. S9  $^1\text{H}$  &  $^{13}\text{C}$  NMR spectrum of Bpy-Pep



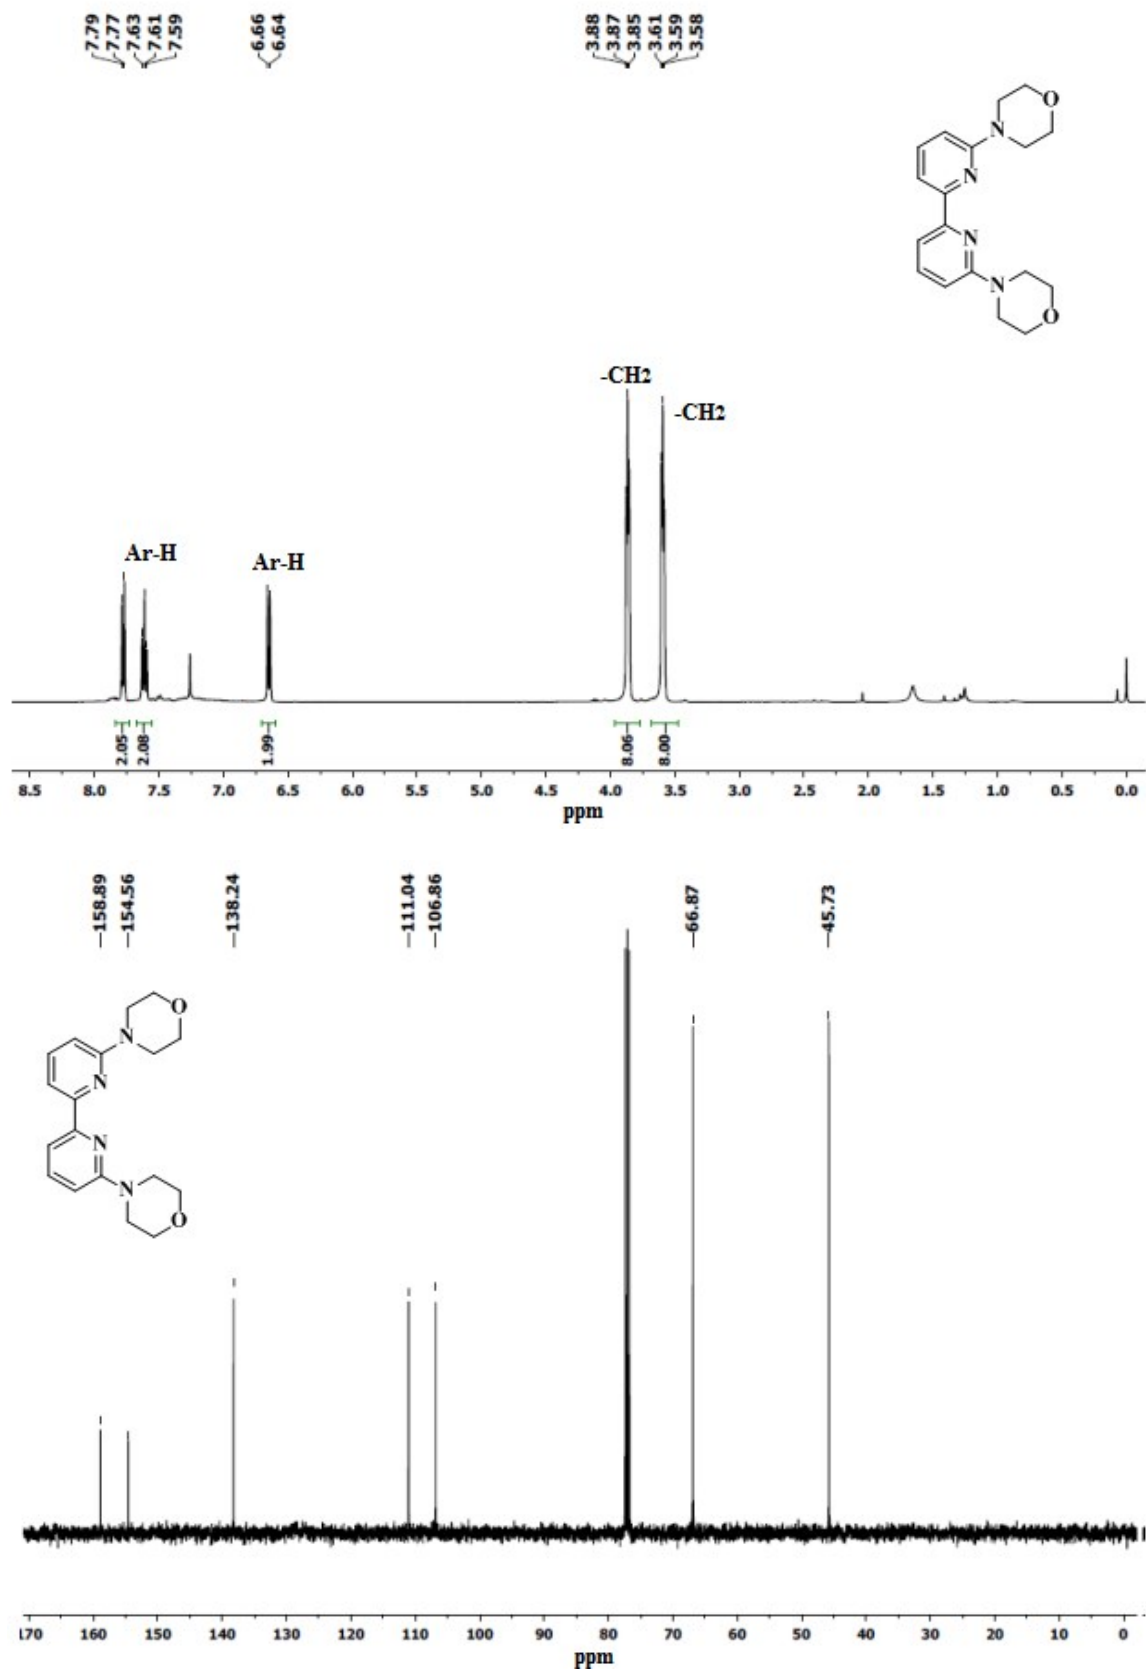

Fig. S10  $^1\text{H}$  &  $^{13}\text{C}$  NMR spectrum of Bpy-Mor.

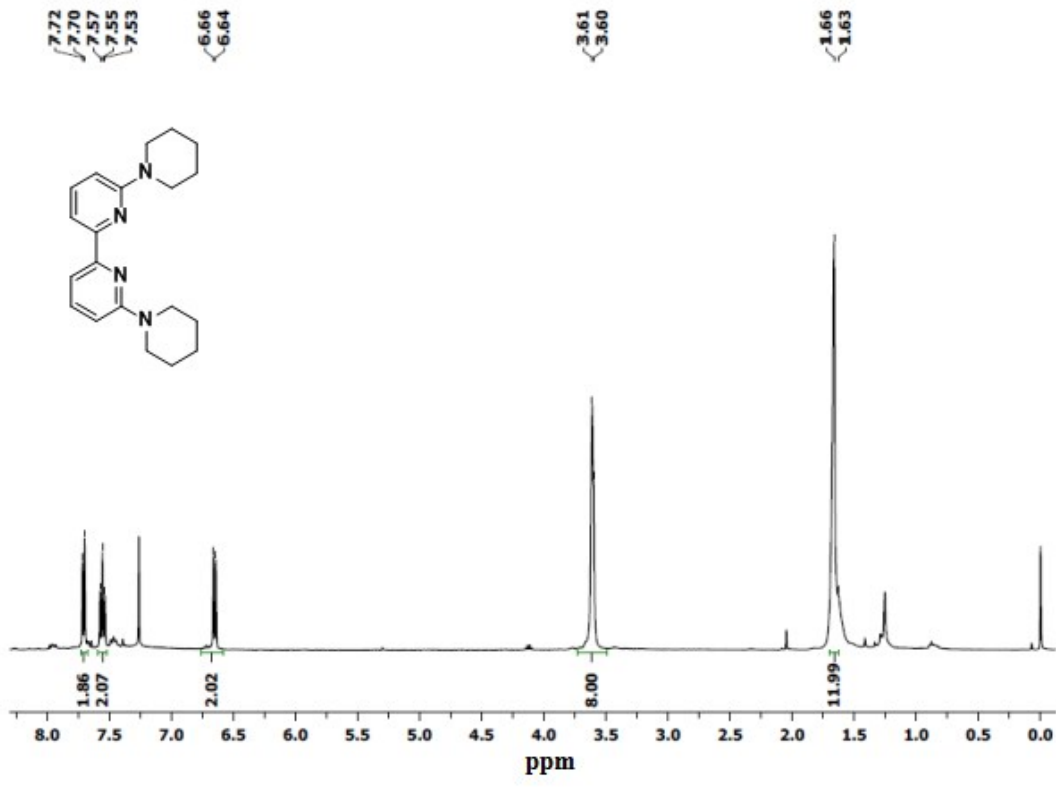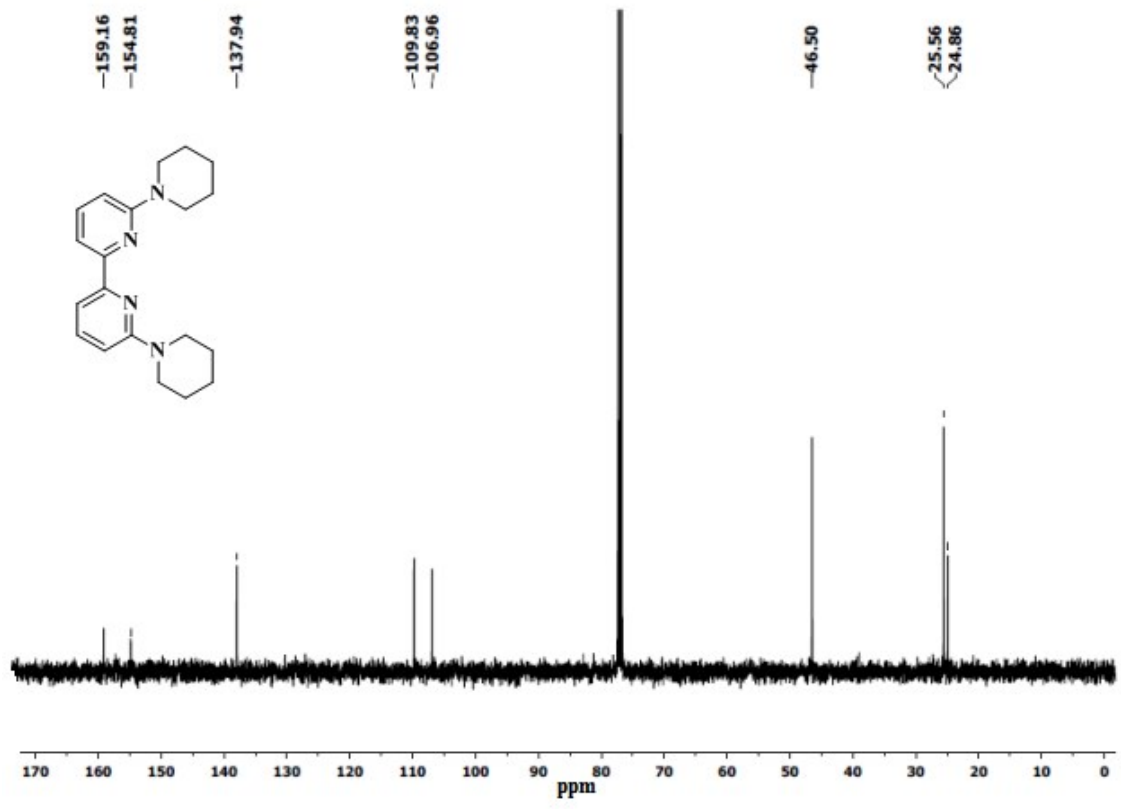

Fig. S11  $^1\text{H}$  &  $^{13}\text{C}$  NMR spectrum of Bpy-Pip.

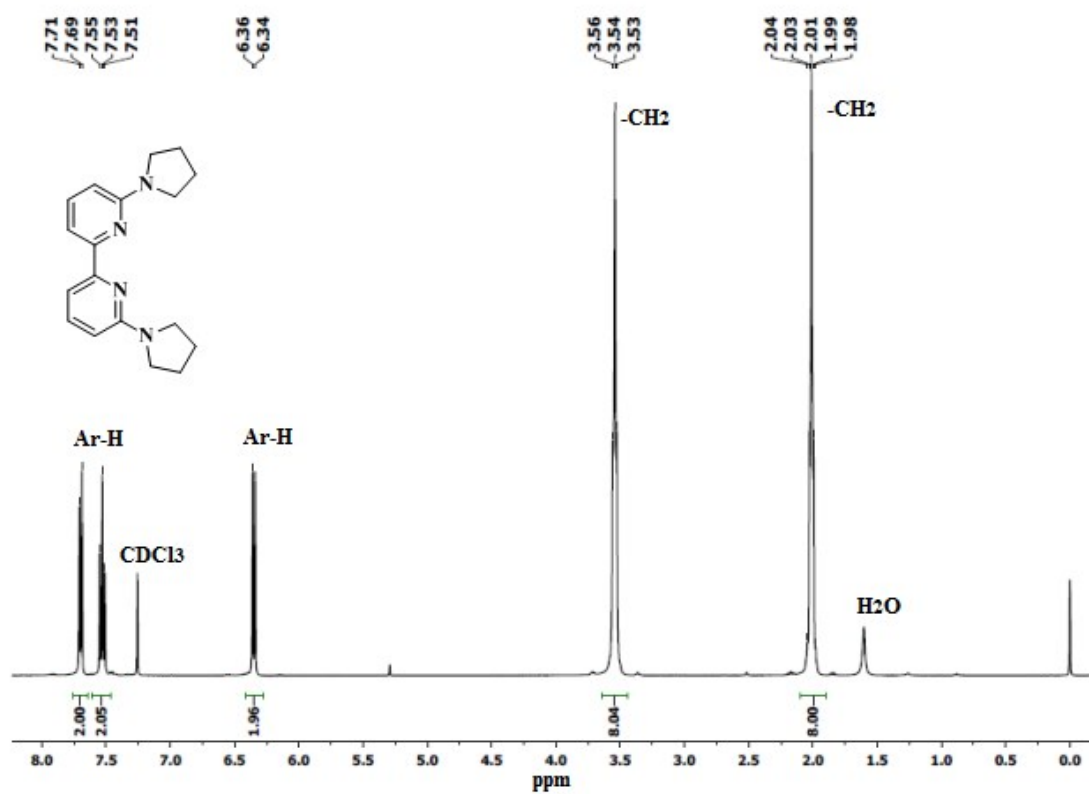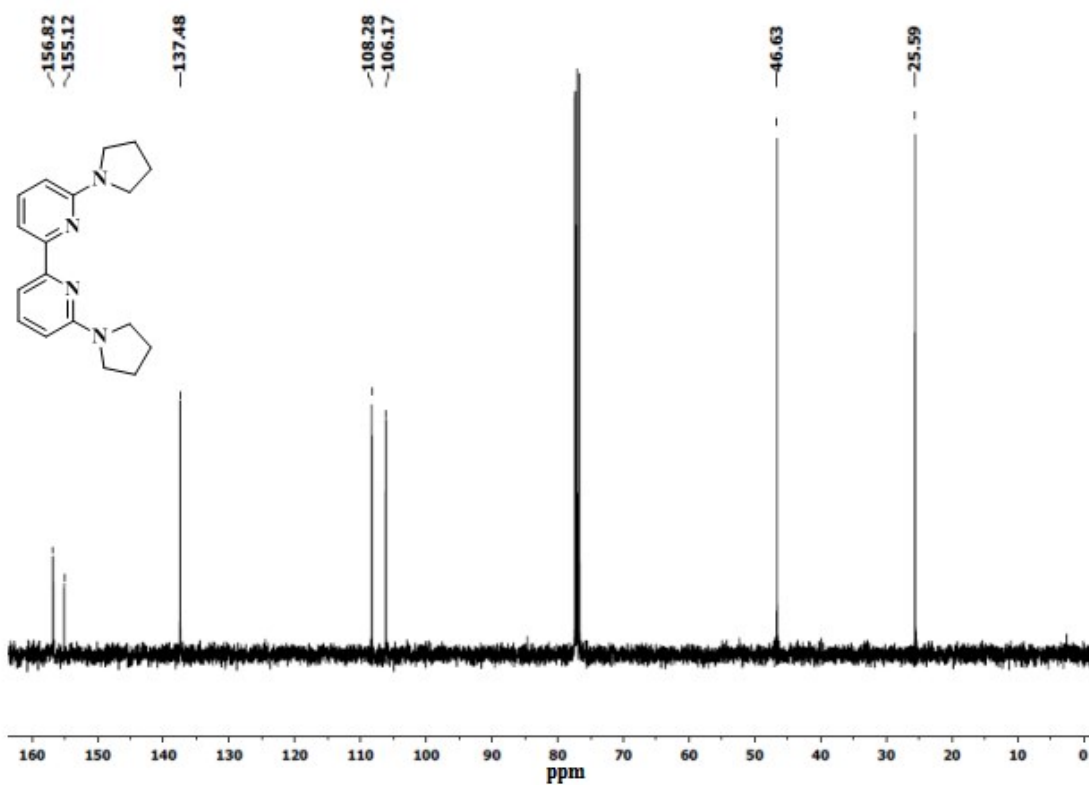

Fig. S12  $^1\text{H}$  &  $^{13}\text{C}$  NMR spectrum of Bpy-Pyr.

### 3. Mass analysis

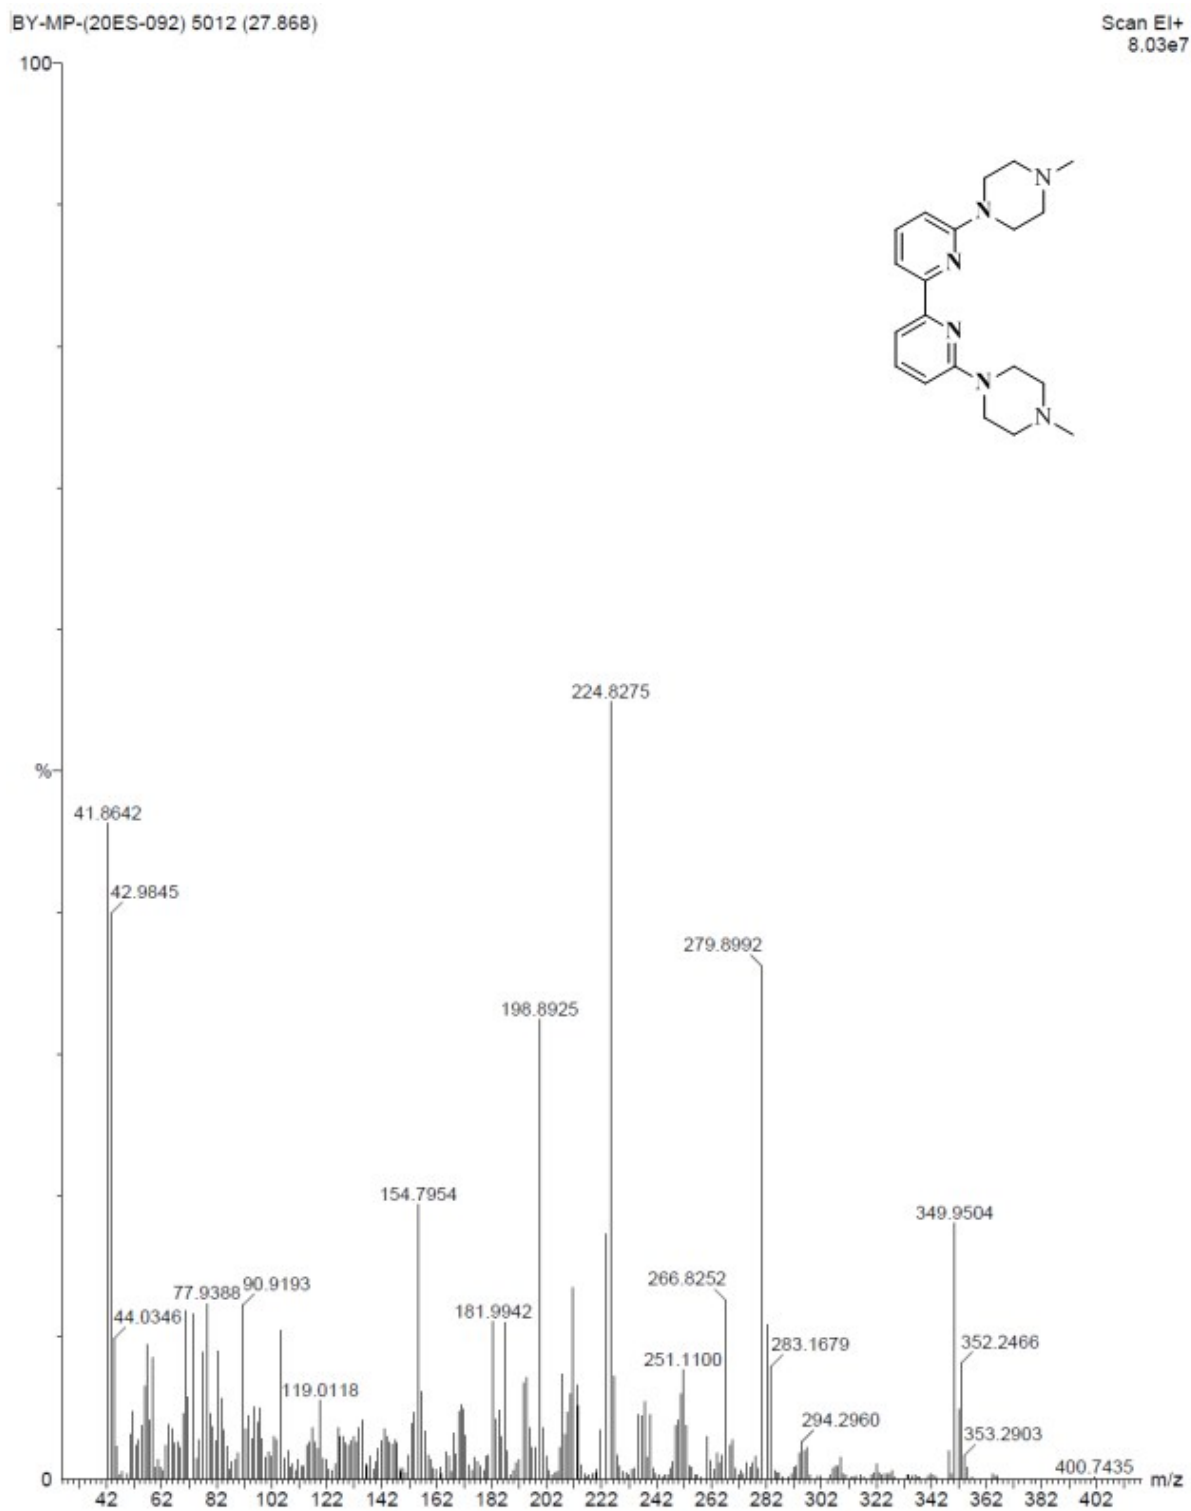

**Fig. S13** ESI-MS spectrum for Bpy-1MP

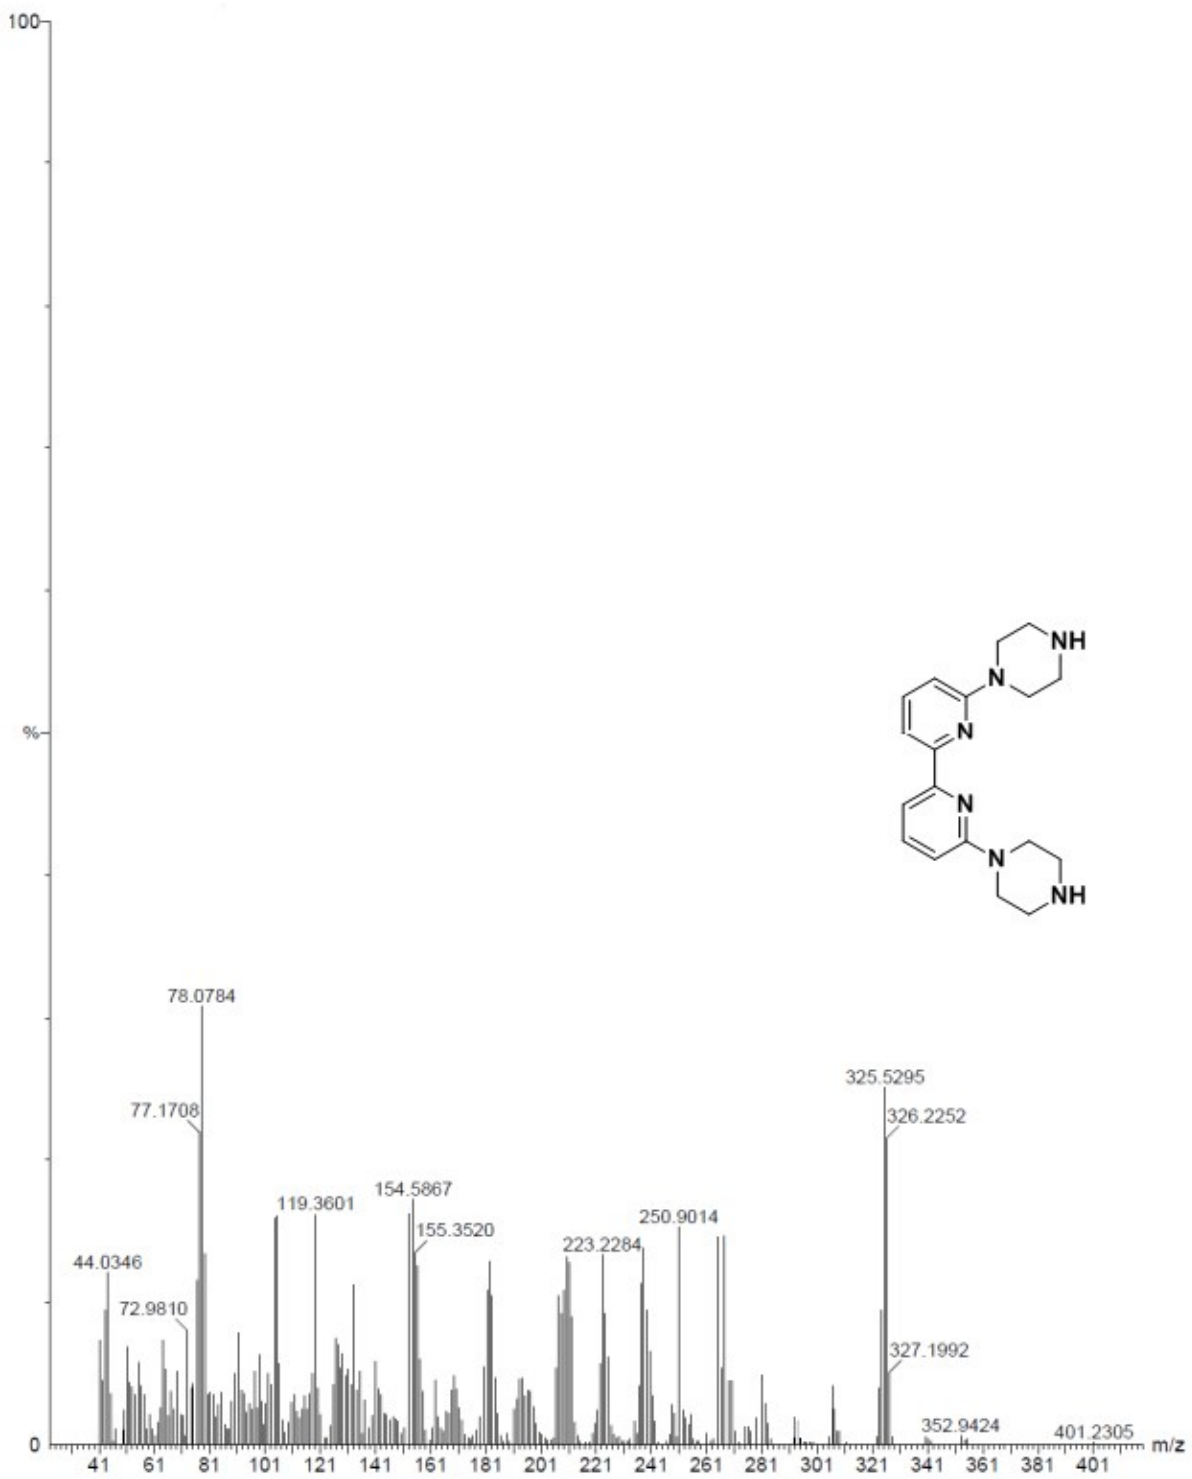

**Fig. S14** ESI-MS spectrum for Bpy-Pep.

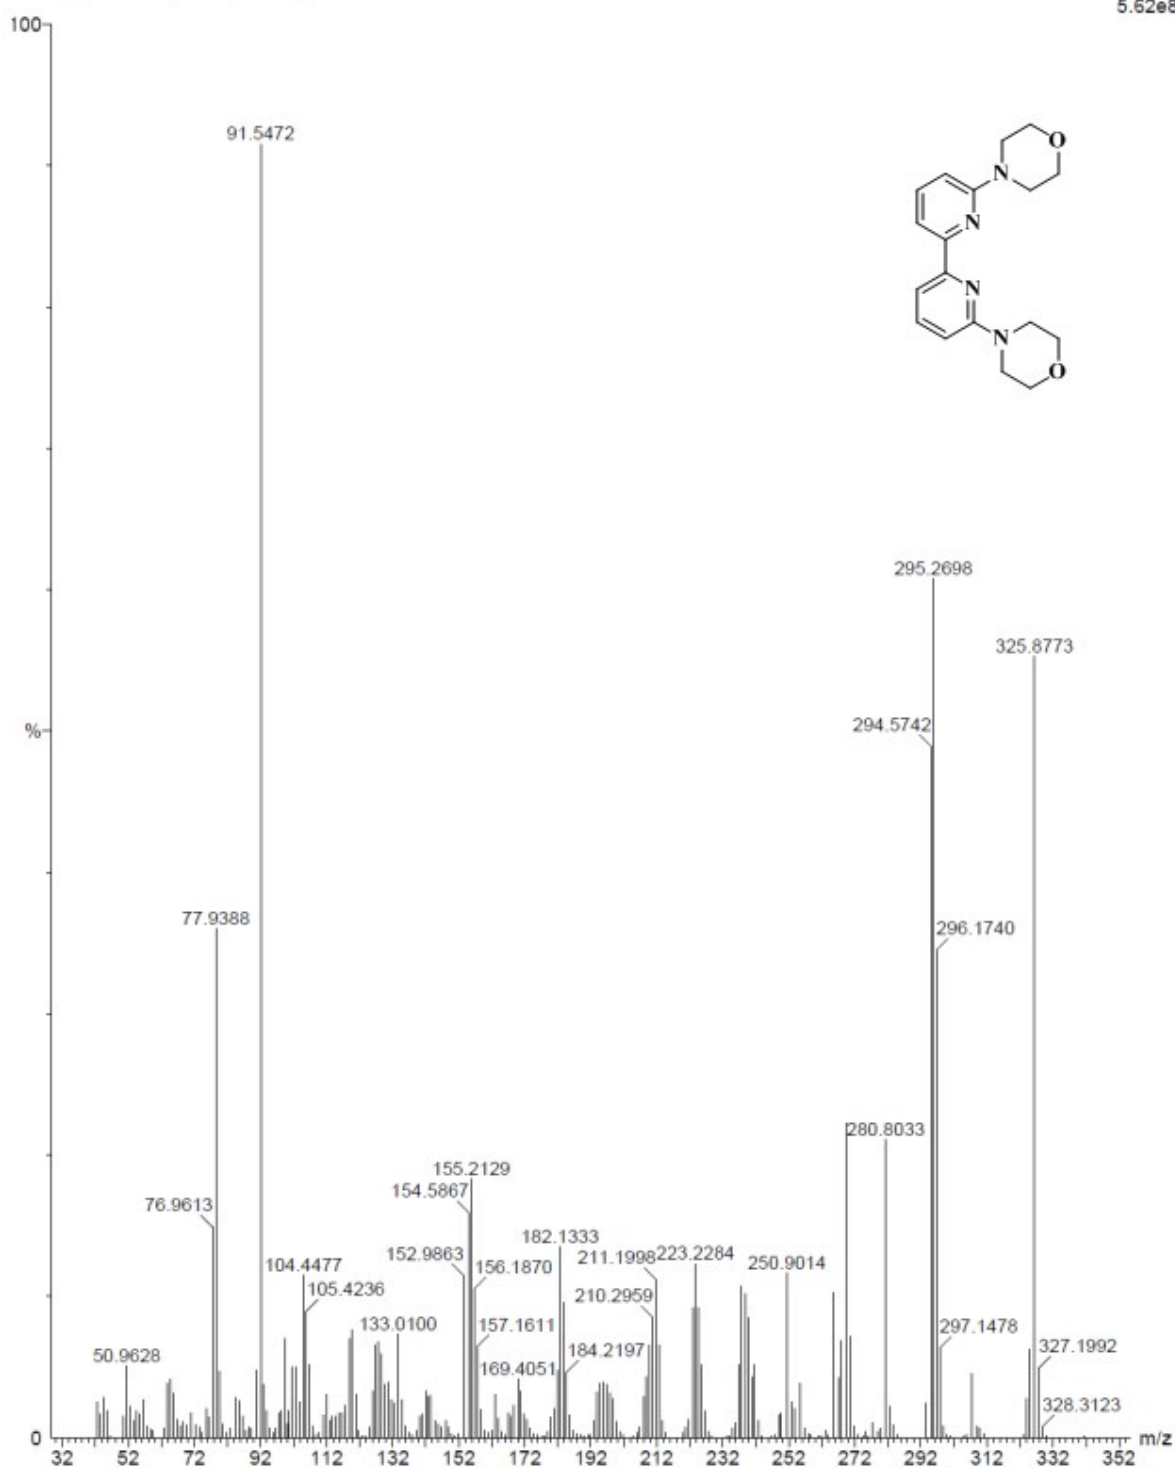

Fig. S15 ESI-MS spectrum for Bpy-Mor

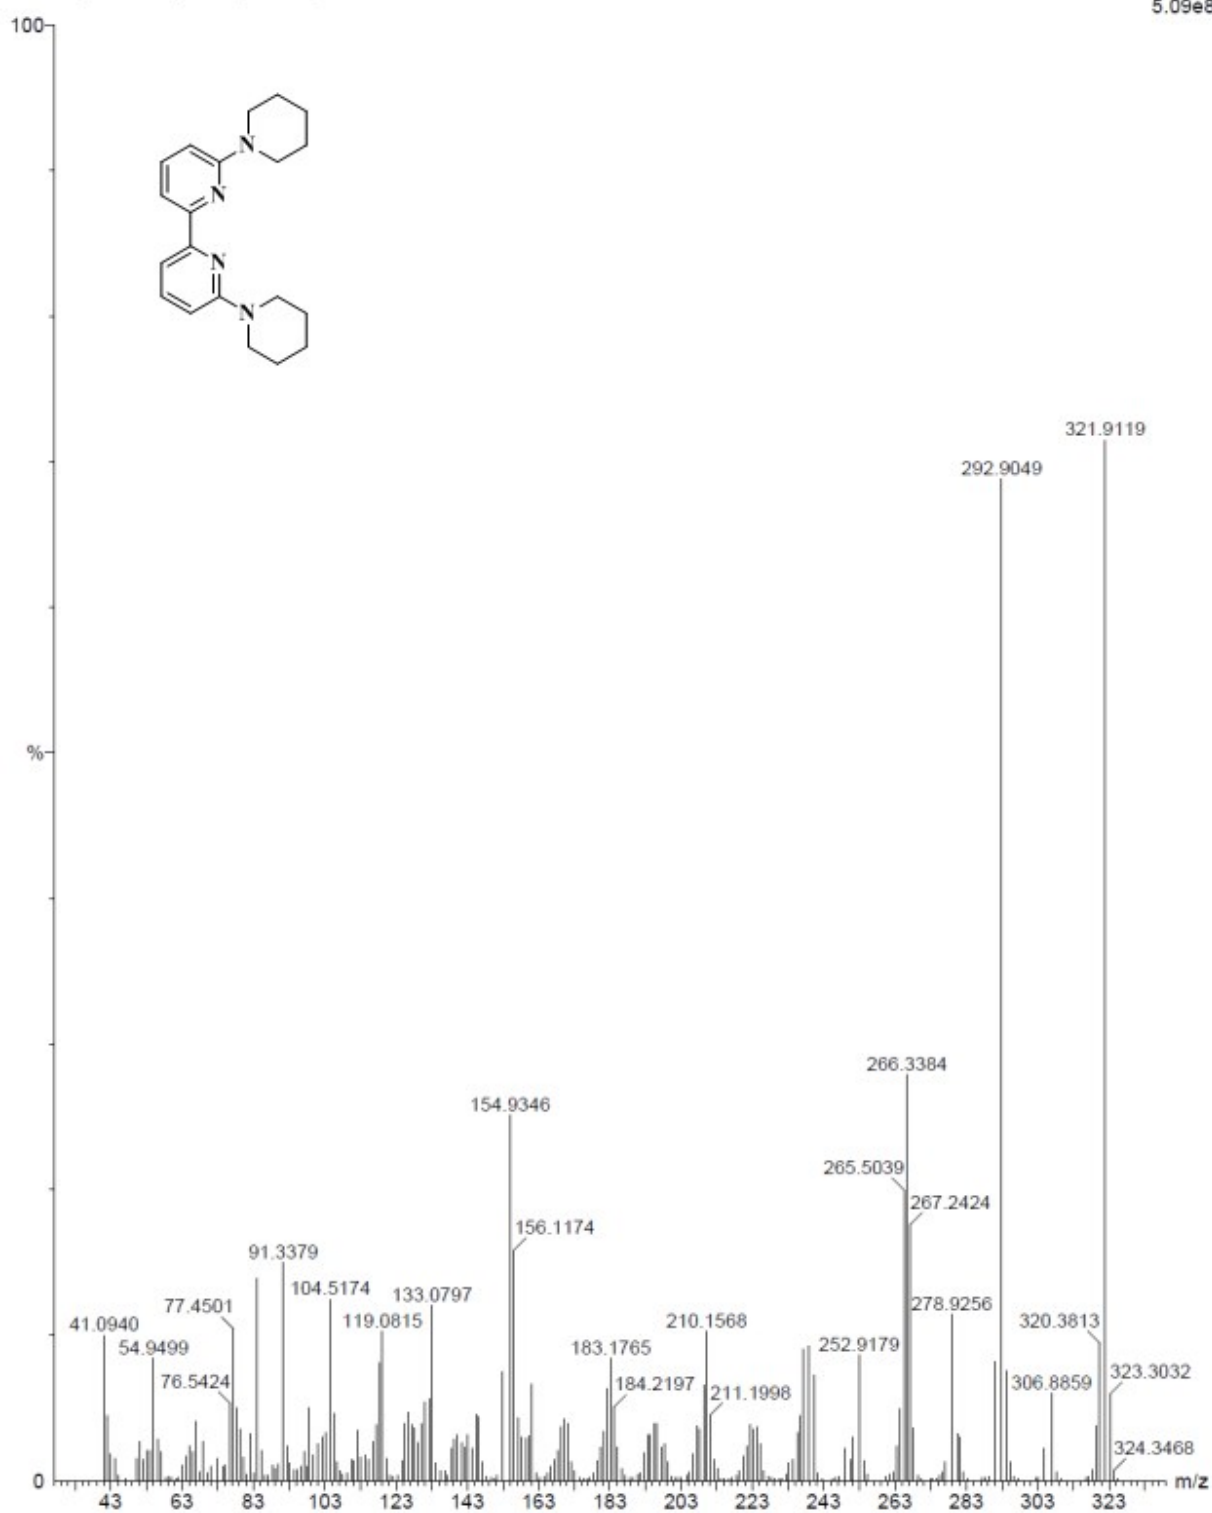

**Fig. S16** ESI-MS spectrum for Bpy-Pip.

#### 4. Single Crystal X-ray crystallography studies

A single crystal of Bpy-1MP, Bpy-Pyr and (Bpy-MorH)PF<sub>6</sub> was coated with paratone-N oil and the diffraction data were measured at 100 K with synchrotron radiation ( $\lambda = 0.60999 \text{ \AA}$ ) on an ADSC Quantum-210 detector at 2D SMC with a silicon (111) double crystal monochromator (DCM) at the Pohang Accelerator Laboratory, Korea. The ADSC Q210 ADX program<sup>1</sup> was used for data collection (the detector distance is 63 mm, omega scan; Do = 31, the exposure time is 2 s per frame) and HKL3000sm (Ver. 703r)<sup>2</sup> was used for cell refinement, reduction and absorption correction. The crystal structure of AAP-Ru, ADABS-Ru(II) and P2P-Ru(II) was solved by the direct method using the SHELX-XT (2014/4) program and refined by full-matrix least square calculations using the SHELX-XL (2014/7) program package.<sup>3</sup> All non-hydrogen atoms were refined anisotropically. The hydrogen atoms were assigned an isotropic displacement coefficient of  $U_{iso}(H) = 1.2$  or  $1.5U_{eq}$ , and their coordinates were allowed to ride on their respective atoms.



**Table S1.** Crystal data and structure refinement for Bpy-1MP, Bpy-Pyr and (Bpy-MorH)PF<sub>6</sub>.

| Compound                                     | Bpy-1MP                                             | Bpy-Pyr                                             | (Bpy-MorH)PF <sub>6</sub>                                                      |
|----------------------------------------------|-----------------------------------------------------|-----------------------------------------------------|--------------------------------------------------------------------------------|
| Empirical formula                            | C <sub>20</sub> H <sub>28</sub> N <sub>6</sub>      | C <sub>18</sub> H <sub>22</sub> N <sub>4</sub>      | C <sub>18</sub> H <sub>23</sub> F <sub>6</sub> N <sub>4</sub> O <sub>2</sub> P |
| Formula weight                               | 352.48                                              | 294.39                                              | 472.37                                                                         |
| T [K]                                        | 220(2)                                              | 220(2)                                              | 220(2)                                                                         |
| $\lambda$ [Å]                                | 0.630                                               | 0.630                                               | 0.630                                                                          |
| Crystal system                               | Monoclinic                                          | Monoclinic                                          | Monoclinic                                                                     |
| Space group                                  | <i>P2<sub>1</sub>/n</i>                             | <i>P2<sub>1</sub>/n</i>                             | <i>P2<sub>1</sub>/c</i>                                                        |
| a, Å                                         | 4.8930(10)                                          | 7.0750(14)                                          | 7.1800(14)                                                                     |
| b, Å                                         | 10.170(2)                                           | 7.3030(15)                                          | 14.821(3)                                                                      |
| c, Å                                         | 18.638(4)                                           | 14.865(3)                                           | 19.057(4)                                                                      |
| $\alpha$ , deg                               | 90                                                  | 90                                                  | 90                                                                             |
| $\beta$ , deg                                | 91.05(3)                                            | 96.04                                               | 98.31(3)                                                                       |
| $\gamma$ , deg                               | 90                                                  | 90                                                  | 90                                                                             |
| V (Å <sup>3</sup> )                          | 927.3(3)                                            | 763.8(3)                                            | 2006.7(7)                                                                      |
| Z                                            | 2                                                   | 2                                                   | 4                                                                              |
| d <sub>calc</sub> (mg/cm <sup>3</sup> )      | 1.262                                               | 1.280                                               | 1.564                                                                          |
| $\mu$ (mm <sup>-1</sup> )                    | 0.062                                               | 0.062                                               | 0.158                                                                          |
| R[I>2 $\sigma$ (I)]                          | R <sub>1</sub> = 0.0492<br>wR <sub>2</sub> = 0.1444 | R <sub>1</sub> = 0.0465<br>wR <sub>2</sub> = 0.1369 | R <sub>1</sub> = 0.1179<br>wR <sub>2</sub> = 0.3022                            |
| R (all data)                                 | R <sub>1</sub> = 0.0542<br>wR <sub>2</sub> = 0.1481 | R <sub>1</sub> = 0.0501<br>wR <sub>2</sub> = 0.1418 | R <sub>1</sub> = 0.1510<br>wR <sub>2</sub> = 0.3195                            |
| Largest diff. Peak/hole [e Å <sup>-3</sup> ] | 0.437/ -0.276                                       | 0.381 /-0.261                                       | 1.497/-0.500                                                                   |

**Table S2.** Selected Bond lengths [ $\text{\AA}$ ] and angles [ $^\circ$ ] for compound **Bpy-1MP**

---

|                  |            |                  |            |
|------------------|------------|------------------|------------|
| N(1)-C(5)        | 1.3374(13) | N(1)-C(1)        | 1.3454(12) |
| N(2)-C(5)        | 1.3978(12) | N(2)-C(6)        | 1.4608(13) |
| N(2)-C(9)        | 1.4616(13) | N(3)-C(7)        | 1.4567(14) |
| N(3)-C(10)       | 1.4586(14) | N(3)-C(8)        | 1.4588(14) |
| C(1)-C(2)        | 1.3851(15) | C(1)-C(1)#1      | 1.493(2)   |
| C(2)-C(3)        | 1.3856(16) | C(3)-C(4)        | 1.3790(15) |
| C(4)-C(5)        | 1.4041(15) | C(6)-C(7)        | 1.5165(15) |
| C(5)-N(1)-C(1)   | 118.88(9)  | C(5)-N(2)-C(6)   | 118.84(9)  |
| C(5)-N(2)-C(9)   | 116.83(8)  | C(6)-N(2)-C(9)   | 112.16(8)  |
| C(7)-N(3)-C(10)  | 109.80(9)  | C(7)-N(3)-C(8)   | 109.08(8)  |
| C(10)-N(3)-C(8)  | 110.47(10) | N(1)-C(1)-C(2)   | 122.83(9)  |
| N(1)-C(1)-C(1)#1 | 115.97(11) | C(2)-C(1)-C(1)#1 | 121.20(11) |
| C(1)-C(2)-C(3)   | 117.83(10) | C(4)-C(3)-C(2)   | 120.39(10) |
| C(3)-C(4)-C(5)   | 118.12(10) | N(1)-C(5)-C(4)   | 121.95(9)  |
| N(1)-C(5)-N(2)   | 116.02(9)  | N(2)-C(5)-C(4)   | 122.01(9)  |
| N(2)-C(6)-C(7)   | 109.89(9)  | N(2)-C(6)-H(6A)  | 109.7      |
| N(3)-C(7)-C(6)   | 112.34(8)  | N(3)-C(8)-C(9)   | 111.30(10) |
| N(2)-C(9)-C(8)   | 111.09(9)  |                  |            |

---

Symmetry transformations used to generate equivalent atoms: #1 -x,-y+1,-z+1

**Table S3.** Selected bond lengths [ $\text{\AA}$ ] and angles [ $^\circ$ ] for compound **Bpy-Pyr**

---

|                  |            |                  |            |
|------------------|------------|------------------|------------|
| N(1)-C(5)        | 1.3454(12) | N(1)-C(1)        | 1.3464(13) |
| N(2)-C(5)        | 1.3602(13) | N(2)-C(9)        | 1.4549(12) |
| N(2)-C(6)        | 1.4650(12) | C(1)-C(2)        | 1.3887(12) |
| C(1)-C(1)#1      | 1.4962(17) | C(2)-C(3)        | 1.3961(13) |
| C(3)-C(4)        | 1.3725(14) | C(4)-C(5)        | 1.4162(12) |
| C(6)-C(7)        | 1.5256(14) | C(7)-C(8)        | 1.5232(16) |
| C(8)-C(9)        | 1.5236(15) | C(5)-N(2)-C(9)   | 124.30(8)  |
| C(5)-N(1)-C(1)   | 118.38(8)  | C(5)-N(2)-C(6)   | 122.35(8)  |
| C(9)-N(2)-C(6)   | 112.60(8)  | N(1)-C(1)-C(2)   | 123.33(9)  |
| N(1)-C(1)-C(1)#1 | 116.15(9)  | C(2)-C(1)-C(1)#1 | 120.51(10) |
| C(1)-C(2)-C(3)   | 117.58(9)  | C(4)-C(3)-C(2)   | 120.57(8)  |
| C(3)-C(4)-C(5)   | 118.06(9)  | N(1)-C(5)-N(2)   | 116.59(8)  |
| N(1)-C(5)-C(4)   | 122.07(9)  | N(2)-C(5)-C(4)   | 121.34(9)  |
| N(2)-C(6)-C(7)   | 104.18(9)  | C(8)-C(7)-C(6)   | 104.52(8)  |
| C(7)-C(8)-C(9)   | 104.03(8)  | N(2)-C(9)-C(8)   | 102.65(8)  |

---

Symmetry transformations used to generate equivalent atoms: #1 -x+1,-y+1,-z+1

**Table S4.** Selected bond lengths [ $\text{\AA}$ ] and angles [ $^\circ$ ] for Compound **(Bpy-MorH)PF<sub>6</sub>**

---

|                   |          |                   |          |
|-------------------|----------|-------------------|----------|
| O(1)-C(8)         | 1.414(7) | O(1)-C(7)         | 1.417(6) |
| O(2)-C(16)        | 1.414(6) | O(2)-C(17)        | 1.417(5) |
| N(1)-C(5)         | 1.337(5) | N(1)-C(1)         | 1.346(5) |
| N(2)-C(5)         | 1.373(5) | N(2)-C(9)         | 1.455(5) |
| N(2)-C(6)         | 1.459(6) | N(3)-C(14)        | 1.356(5) |
| N(3)-C(10)        | 1.370(5) | N(4)-C(14)        | 1.338(5) |
| N(4)-C(18)        | 1.475(5) | N(4)-C(15)        | 1.475(5) |
| C(1)-C(2)         | 1.384(5) | C(1)-C(10)        | 1.486(5) |
| C(2)-C(3)         | 1.393(6) | C(3)-C(4)         | 1.377(6) |
| C(4)-C(5)         | 1.420(5) | C(6)-C(7)         | 1.494(6) |
| C(8)-C(9)         | 1.514(7) | C(10)-C(11)       | 1.357(5) |
| C(11)-C(12)       | 1.413(6) | C(12)-C(13)       | 1.355(6) |
| C(13)-C(14)       | 1.420(5) | C(15)-C(16)       | 1.506(6) |
| C(17)-C(18)       | 1.517(6) | C(8)-O(1)-C(7)    | 109.9(4) |
| C(16)-O(2)-C(17)  | 109.9(3) | C(5)-N(1)-C(1)    | 118.8(3) |
| C(5)-N(2)-C(9)    | 120.0(3) | C(5)-N(2)-C(6)    | 118.5(3) |
| C(9)-N(2)-C(6)    | 113.6(4) | C(14)-N(3)-C(10)  | 125.4(3) |
| C(14)-N(4)-C(18)  | 122.3(3) | C(14)-N(4)-C(15)  | 121.7(3) |
| C(18)-N(4)-C(15)  | 113.6(3) | N(1)-C(1)-C(2)    | 124.3(3) |
| N(1)-C(1)-C(10)   | 113.7(3) | C(2)-C(1)-C(10)   | 121.9(3) |
| C(1)-C(2)-C(3)    | 116.6(4) | C(4)-C(3)-C(2)    | 120.5(4) |
| C(3)-C(4)-C(5)    | 118.9(3) | N(1)-C(5)-N(2)    | 116.7(3) |
| N(1)-C(5)-C(4)    | 120.8(3) | N(2)-C(5)-C(4)    | 122.5(3) |
| N(2)-C(6)-C(7)    | 111.1(4) | O(1)-C(7)-C(6)    | 113.1(4) |
| O(1)-C(8)-C(9)    | 112.8(4) | N(2)-C(9)-C(8)    | 108.9(4) |
| C(11)-C(10)-N(3)  | 118.8(3) | C(11)-C(10)-C(1)  | 127.8(4) |
| N(3)-C(10)-C(1)   | 113.4(3) | C(10)-C(11)-C(12) | 118.3(4) |
| C(13)-C(12)-C(11) | 121.6(4) | C(12)-C(13)-C(14) | 120.3(4) |
| N(4)-C(14)-N(3)   | 119.6(3) | N(4)-C(14)-C(13)  | 124.9(4) |
| N(3)-C(14)-C(13)  | 115.5(4) | N(4)-C(15)-C(16)  | 110.1(4) |
| O(2)-C(16)-C(15)  | 111.3(4) | O(2)-C(17)-C(18)  | 110.3(4) |
| N(4)-C(18)-C(17)  | 108.9(3) |                   |          |

---

## 5. Photophysical Properties

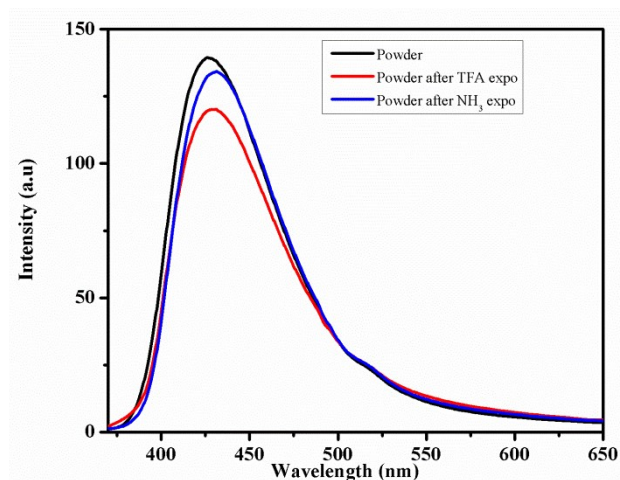

**Fig. S17** Solid state fluorescence spectra of Bpy-1MP before and after exposure to TFA vapor followed by NH<sub>3</sub> vapor exposure.

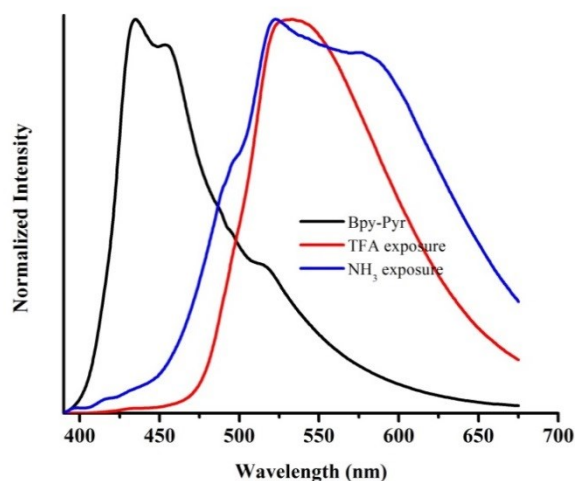

**Fig. S18** Fluorescence spectra of Bpy-pyr before and after exposure to TFA vapor followed by NH<sub>3</sub> vapor exposure.

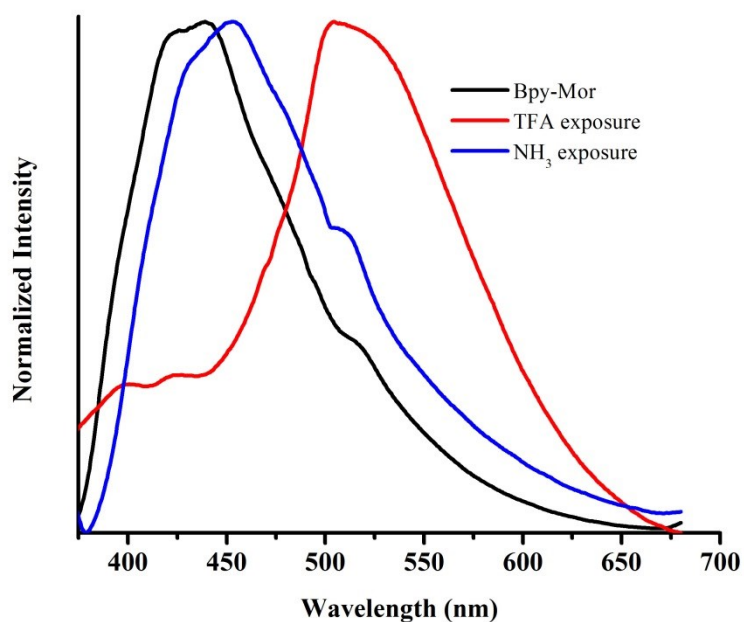

**Fig. S19** Fluorescence spectra of Bpy-Mor before and after exposure to TFA vapor followed by  $\text{NH}_3$  vapor exposure.

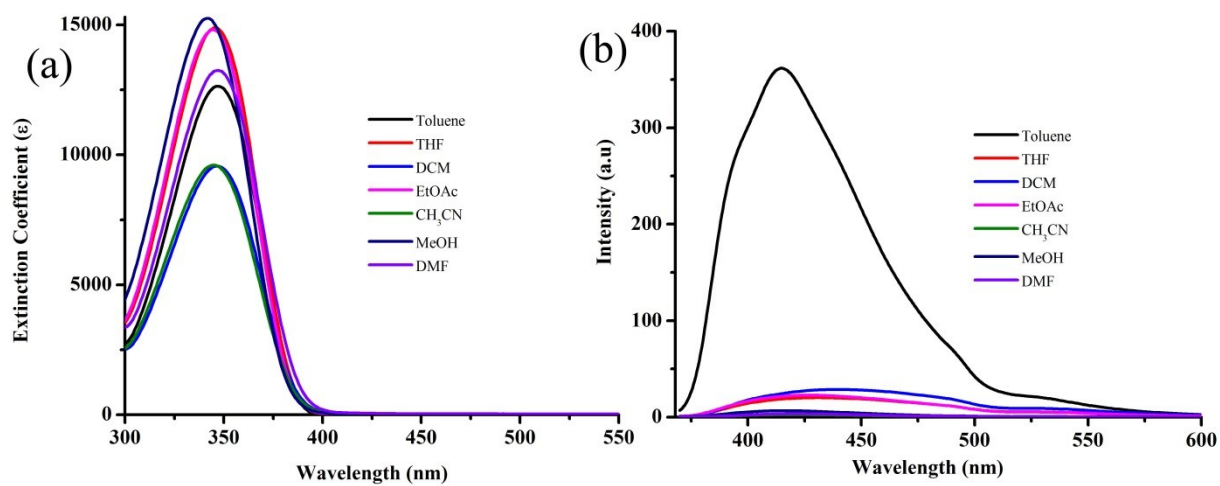

**Fig. S20** (a) Absorption spectra of Bpy-1MP in different solvents. (b) Fluorescence spectra of Bpy-1MP in different solvents.

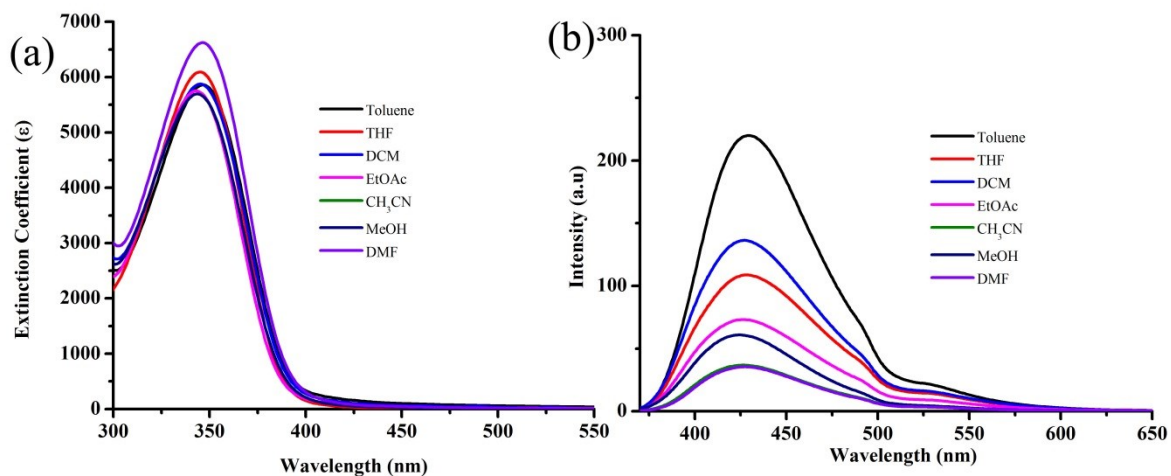

**Fig. S21** (a) Absorption spectra of Bpy-BP in different solvents. (b) Fluorescence spectra of Bpy-BP in different solvents.

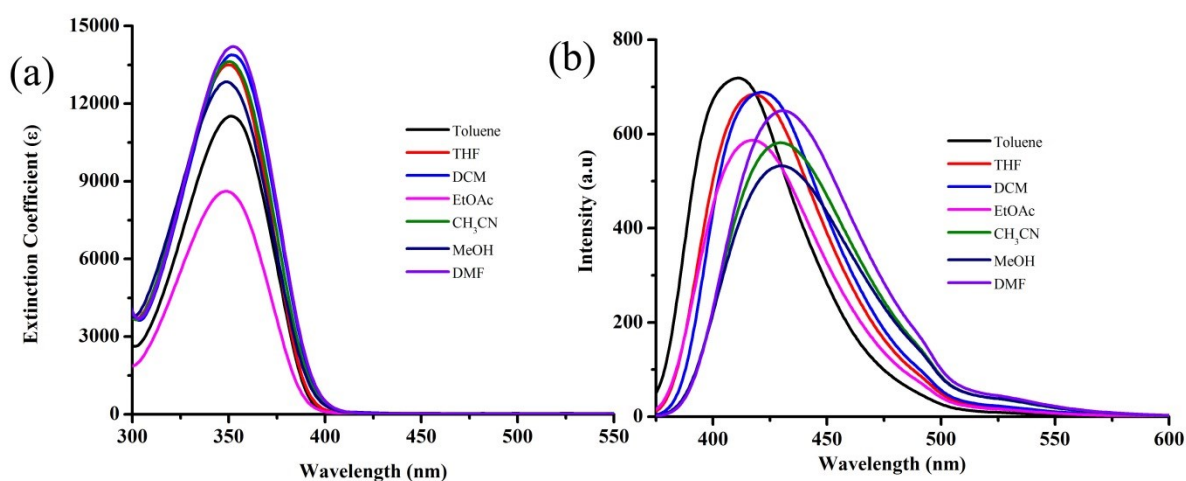

**Fig. S22** (a) Absorption spectra of Bpy-Pep in different solvents. (b) Fluorescence spectra of Bpy-Pep in different solvents.

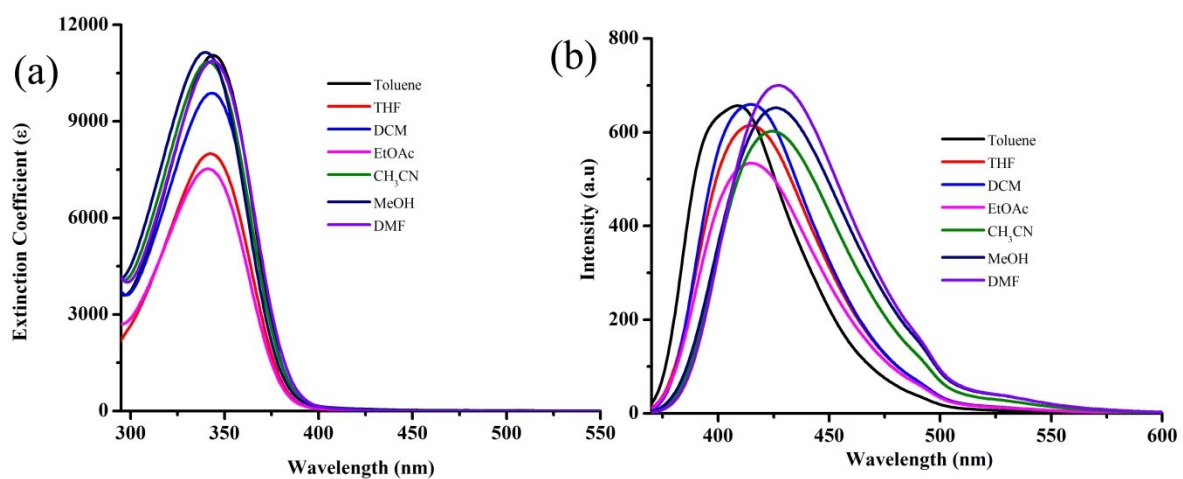

**Fig. S23** (a) Absorption spectra of Bpy-Mor in different solvents. (b) Fluorescence spectra of Bpy-Mor in different solvents.

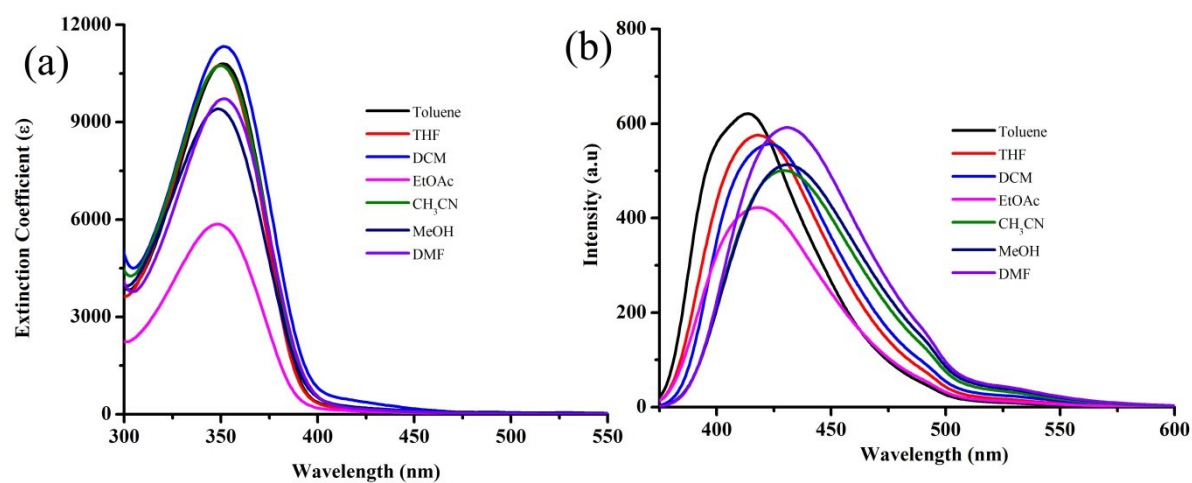

**Fig. S24** (a) Absorption spectra of Bpy-Pip in different solvents. (b) Fluorescence spectra of Bpy-Pip in different solvents.



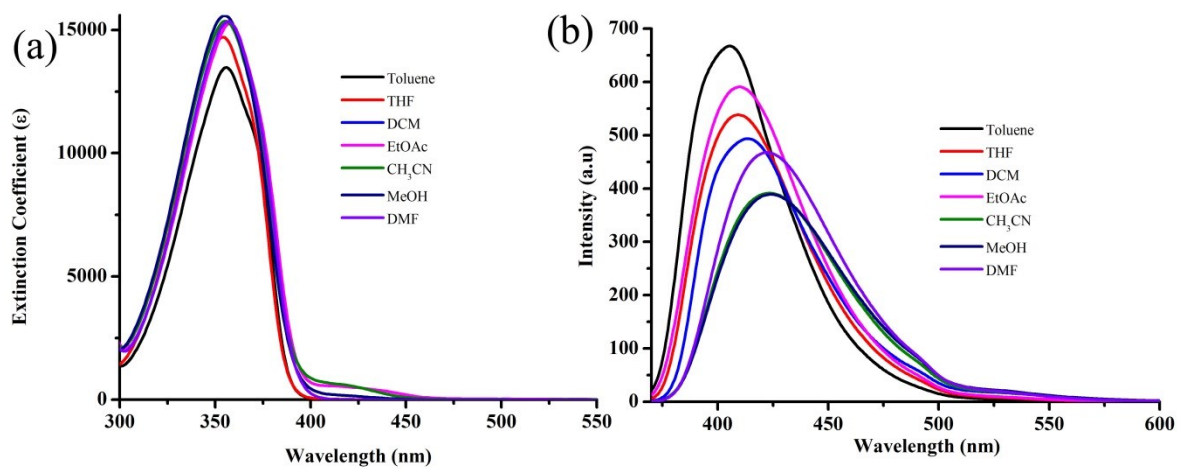

**Fig. S25** (a) Absorption spectra of Bpy-Pyr in different solvents. (b) Fluorescence spectra of Bpy-Pyr in different solvents.

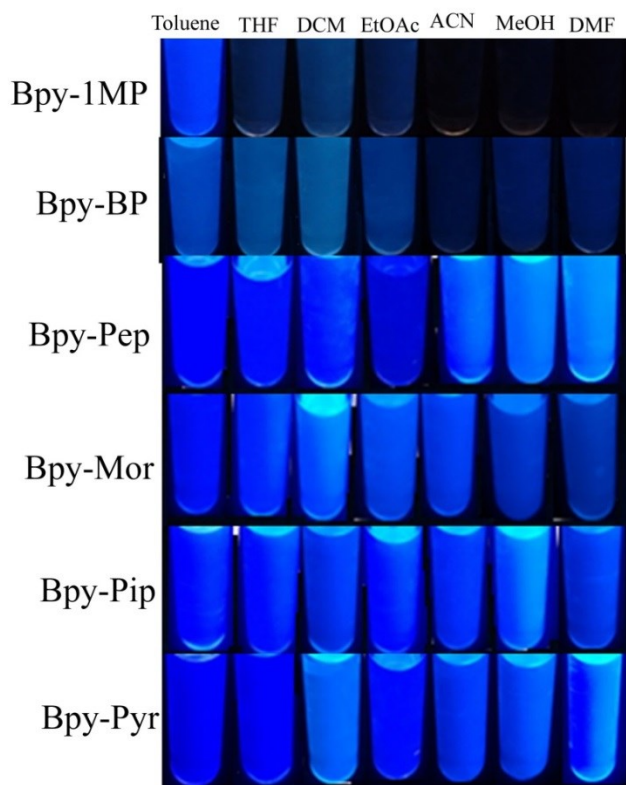

**Fig. S26** Digital images of emission color of Bpy-BP, Bpy-Pep, Bpy-Mor, Bpy-Pip and Bpy-Pyr at different solvents under 365 nm irradiation.

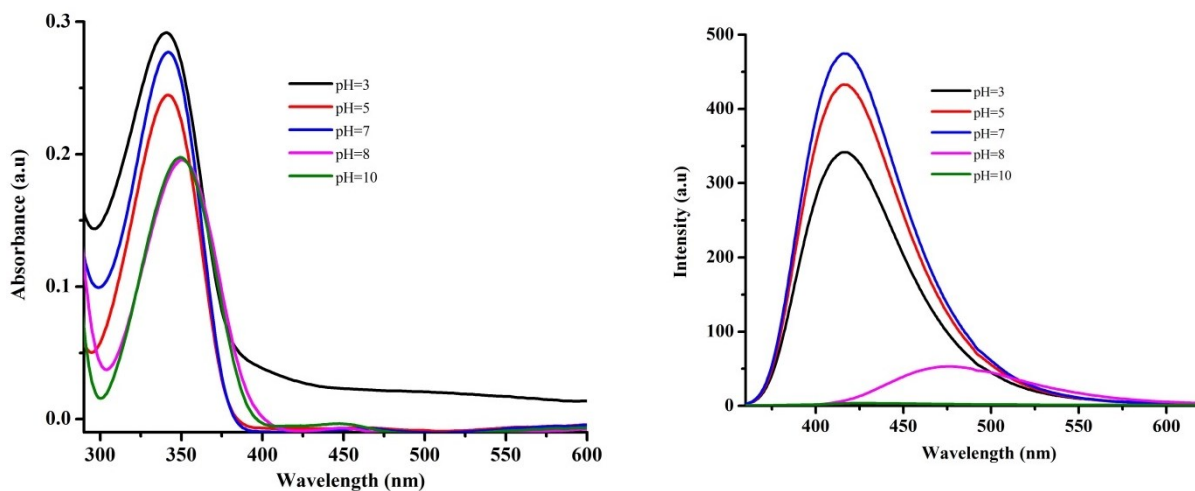

**Fig. S27** (a) Absorption spectra of Bpy-1MP at different pH conditions (pH 3, 5, 7, 8 and 10) in DMF solvent. (b) Fluorescence spectra of Bpy-1MP at different pH conditions (pH 3, 5, 7, 8 and 10) in DMF solvent.

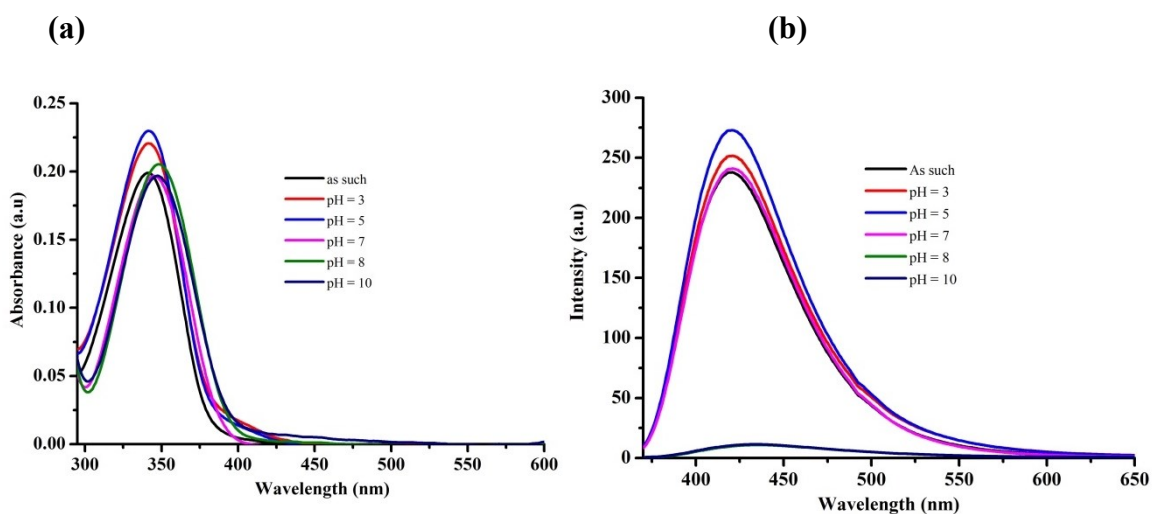

**Fig. S28** (a) Absorption spectra of Bpy-BP at different pH conditions (pH 3, 5, 7, 8 and 10) in DMF solvent. (b) Fluorescence spectra of Bpy-BP at different pH conditions (pH 3, 5, 7, 8 and 10) in DMF solvent.

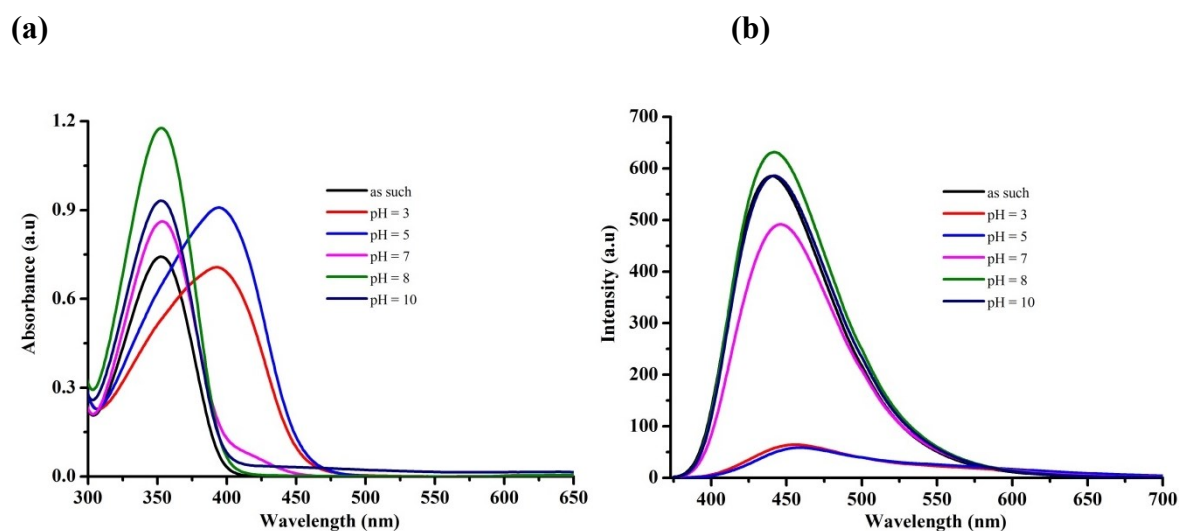

**Fig. S29** (a) Absorption spectra of Bpy-Pep at different pH conditions (pH 3, 5, 7, 8 and 10) in DMF solvent. (b) Fluorescence spectra of Bpy-Pep at different pH conditions (pH 3, 5, 7, 8 and 10) in DMF solvent.

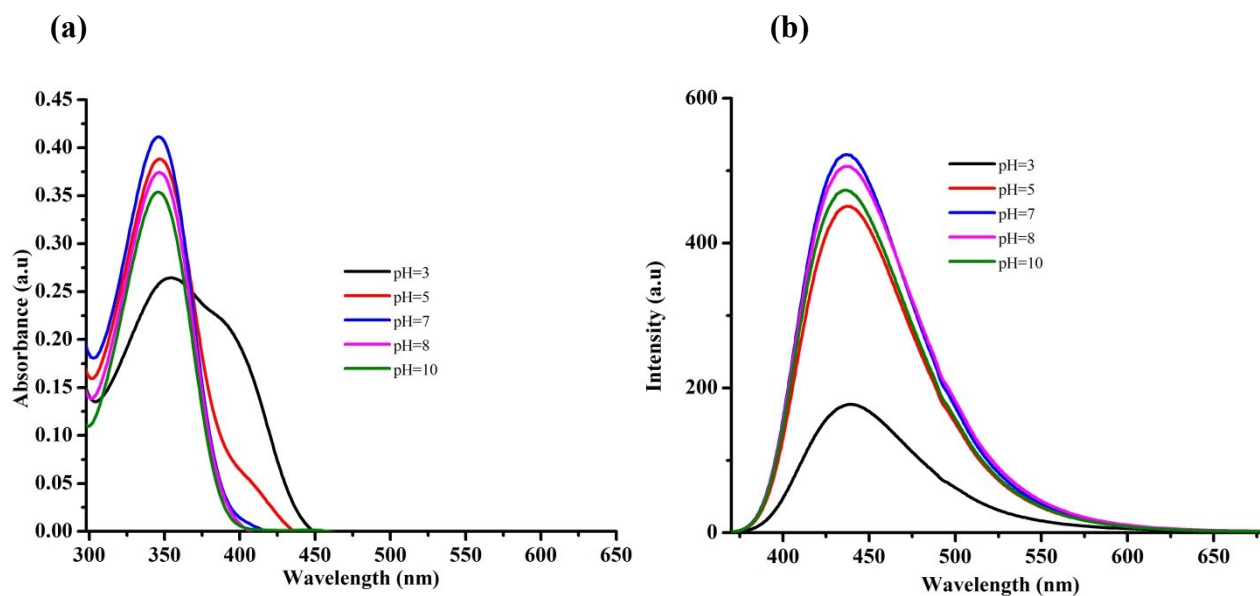

**Fig. S30** (a) Absorption spectra of Bpy-Mor at different pH conditions (pH 3, 5, 7, 8 and 10) in DMF solvent. (b) Fluorescence spectra of Bpy-Mor at different pH conditions (pH 3, 5, 7, 8 and 10) in DMF solvent.

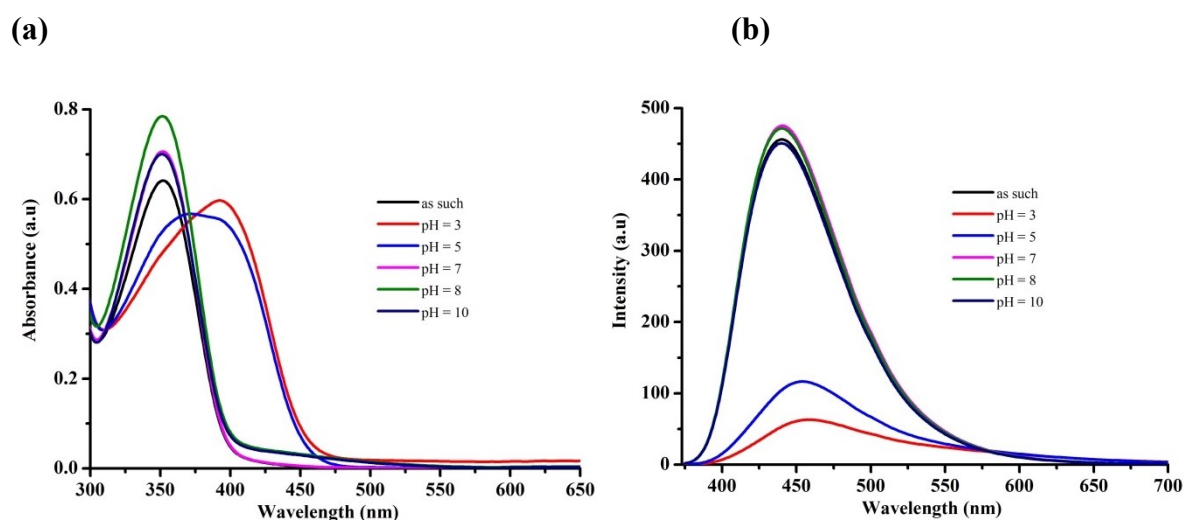

**Fig. S31** (a) Absorption spectra of Bpy-Pip at different pH conditions (pH 3, 5, 7, 8 and 10) in DMF solvent. (b) Fluorescence spectra of Bpy-Pip at different pH conditions (pH 3, 5, 7, 8 and 10) in DMF solvent.

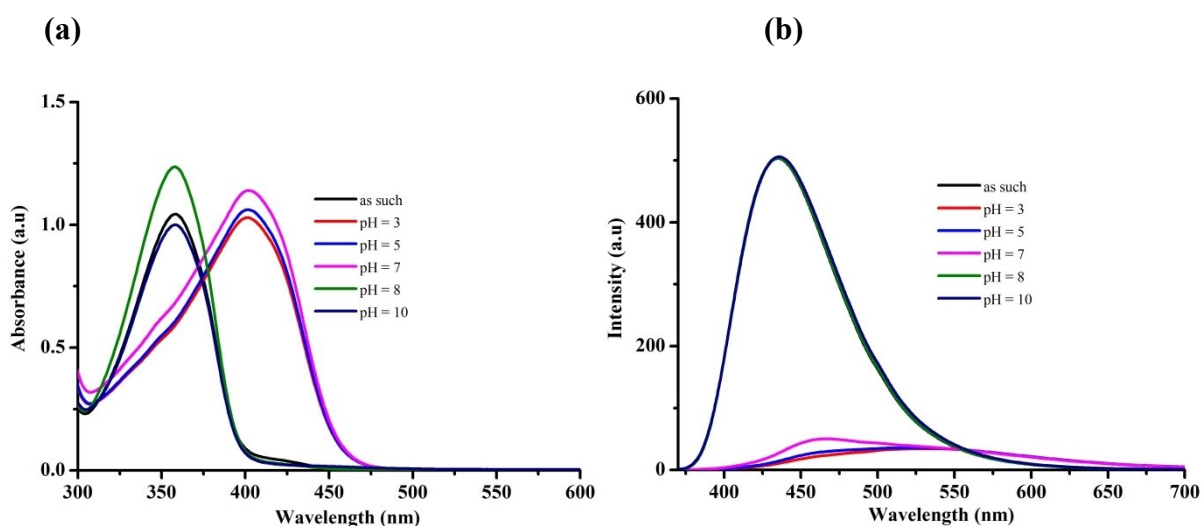

**Fig. S32** (a) Absorption spectra of Bpy-Pyr at different pH conditions (pH 3, 5, 7, 8 and 10) in DMF solvent. (b) Fluorescence spectra of Bpy-Pyr at different pH conditions (pH 3, 5, 7, 8 and 10) in DMF solvent.

## 6. References

1. Arvai, A. J.; Nielsen, C. ADSC Quantum-210 ADX Program, Area Detector System Corporation; Poway, CA, USA, **1983**.
2. Otwinowski, Z.; Minor, W.; Carter, Jr., C. W.; Sweet, R. M. *Methods in Enzymology*, ed. Academic Press, New York, **1997**, vol. 276, part A, pp. 307.
3. Sheldrick, G. M. A Short History of SHELX. *Acta Cryst.*, **2008**, A64, 112–122.
